# Supplementary material for: Targeting tubulin polymerization and DNA binding of 4-thiazolidinone–umbelliferone hybrids: synthesis and cytotoxicity evaluation
Source: Royal Society of Chemistry journal article supplement (doi:10.1039/d1nj03135j), 2021-01-01
Supplement: d1nj03135j1.pdf [file d1nj03135j1.pdf]

## Supporting Information

### Targeting Tubulin Polymerization and DNA Binding of 4-Thiazolidinone-umbelliferone Hybrids: Synthesis and Cytotoxicity Evaluation

Dilep Kumar Sigalapalli<sup>a</sup>, Gaddam Kiranmai<sup>b</sup>, Ramya Tokala<sup>a</sup>, Chaturvedula Tripura<sup>b</sup>,  
Ramesh Ambatwar<sup>a</sup>, Saiprasad N. Nunewar<sup>a</sup>, Manasa Kadagathur<sup>a</sup>, Nagula Shankaraiah<sup>a\*</sup>,  
Narayana Nagesh<sup>b\*</sup>, Bathini Nagendra Babu<sup>c\*</sup>, Neelima D. Tangellamudi<sup>a\*</sup>

<sup>a</sup>*Department of Medicinal Chemistry, National Institute of Pharmaceutical  
Education and Research (NIPER), Hyderabad 500037, India*

<sup>b</sup>*CSIR-Centre for Cellular and Molecular Biology, Medical Biotechnology  
Complex, ANNEXE II, Uppal Road, Hyderabad 500007, India*

<sup>c</sup>*Department of Fluoro-Agrochemicals, CSIR-Indian Institute of Chemical  
Technology, Hyderabad 500007, India*

# Copies of $^1\text{H}$ and $^{13}\text{C}$ NMR spectra

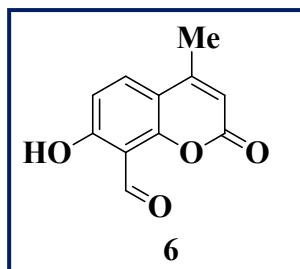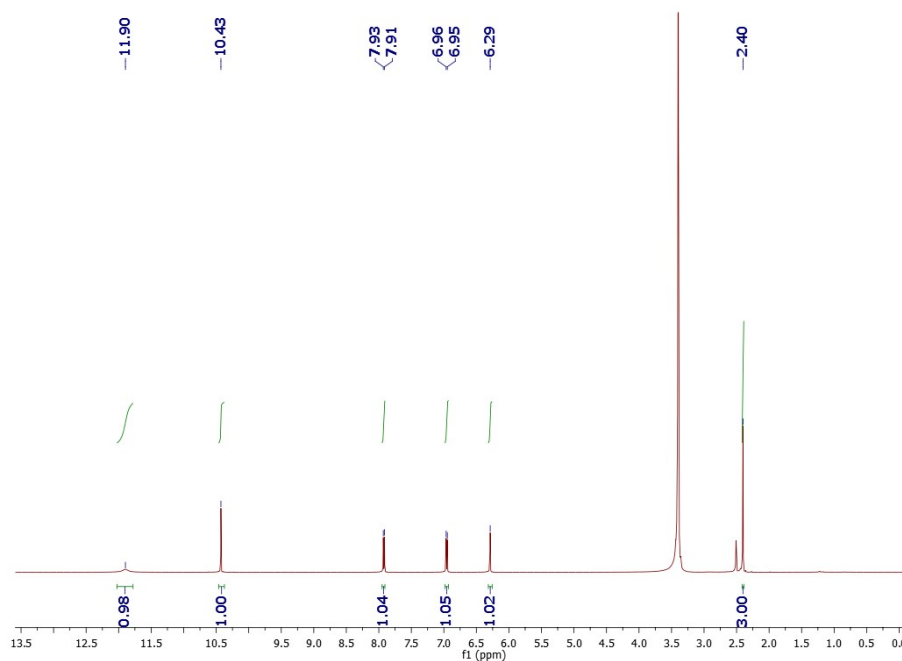

Compound (**6**):  $^1\text{H}$  NMR (500 MHz,  $\text{DMSO-}d_6$ )

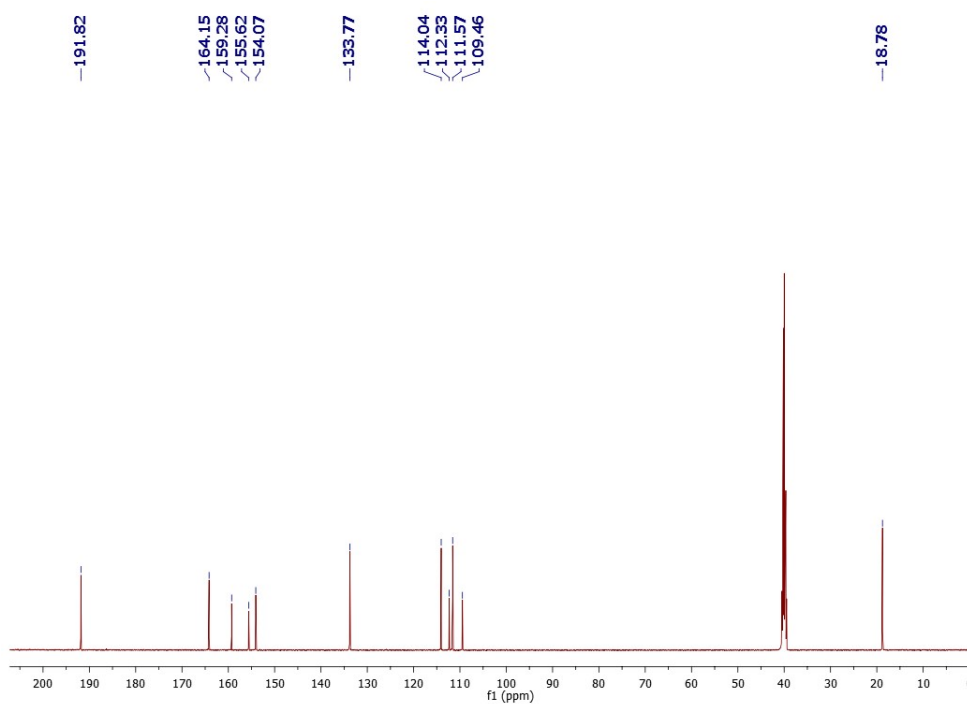

Compound (**6**):  $^{13}\text{C}$  NMR (125 MHz,  $\text{DMSO-}d_6$ )

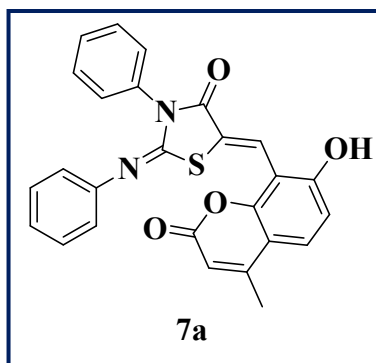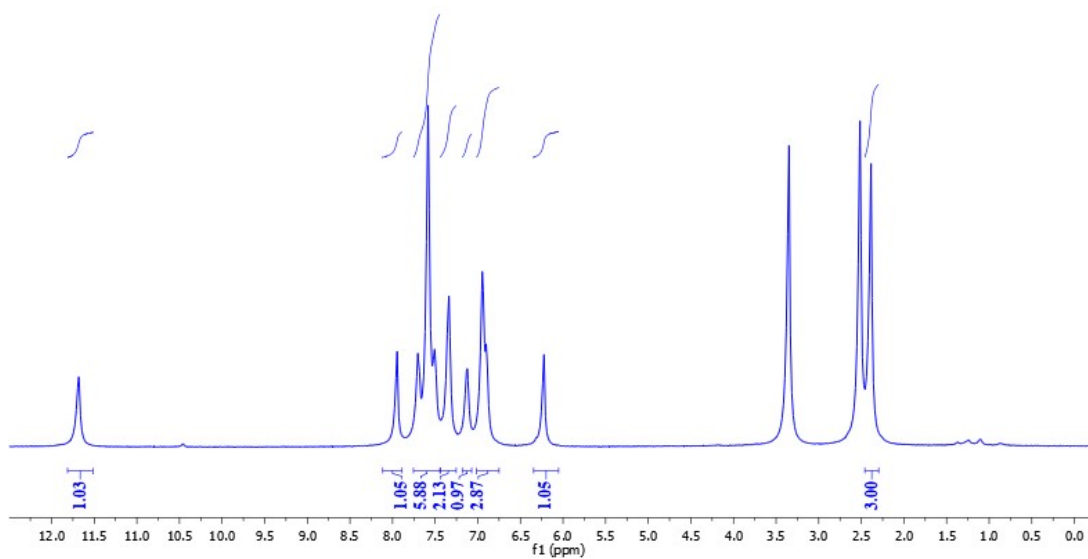

Compound (**7a**):  $^1\text{H}$  NMR (500 MHz,  $\text{DMSO-}d_6$ )

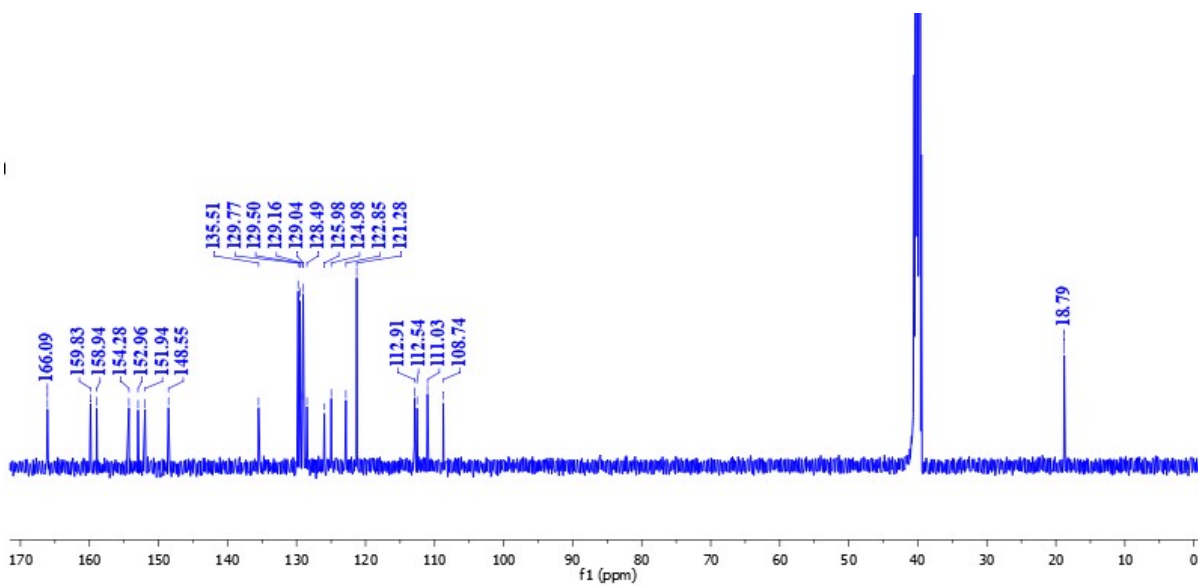

Compound (**7a**):  $^{13}\text{C}$  NMR (125 MHz,  $\text{DMSO-}d_6$ )

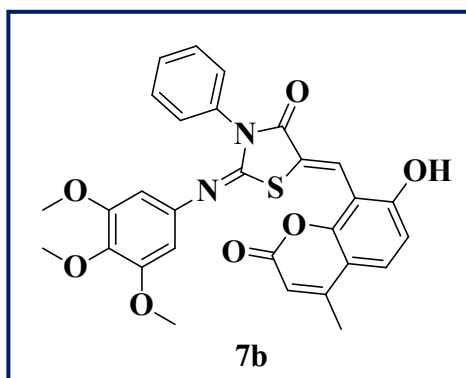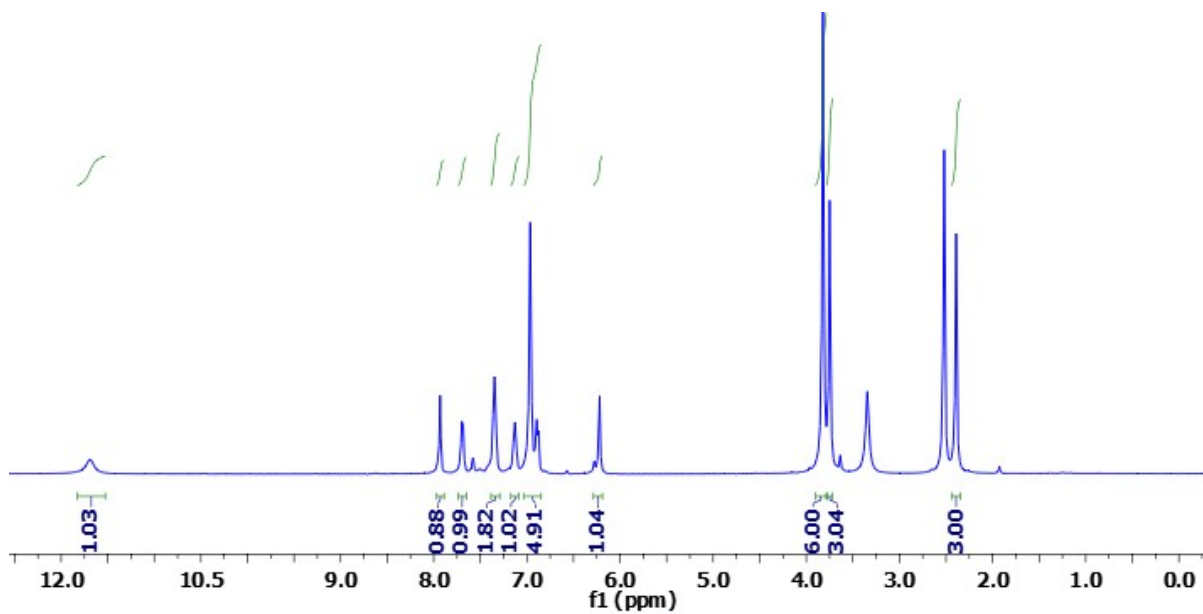

Compound (**7b**):  $^1\text{H}$  NMR (500 MHz,  $\text{DMSO-}d_6$ )

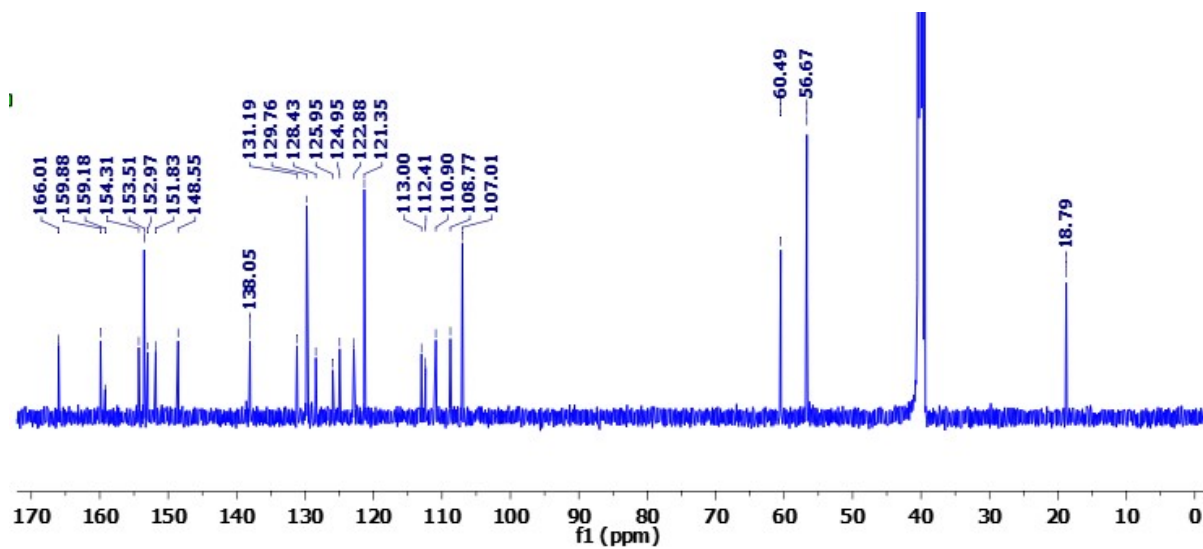

Compound (**7b**):  $^{13}\text{C}$  NMR (125 MHz,  $\text{DMSO-}d_6$ )

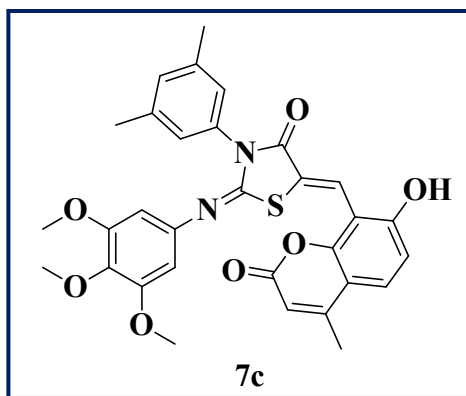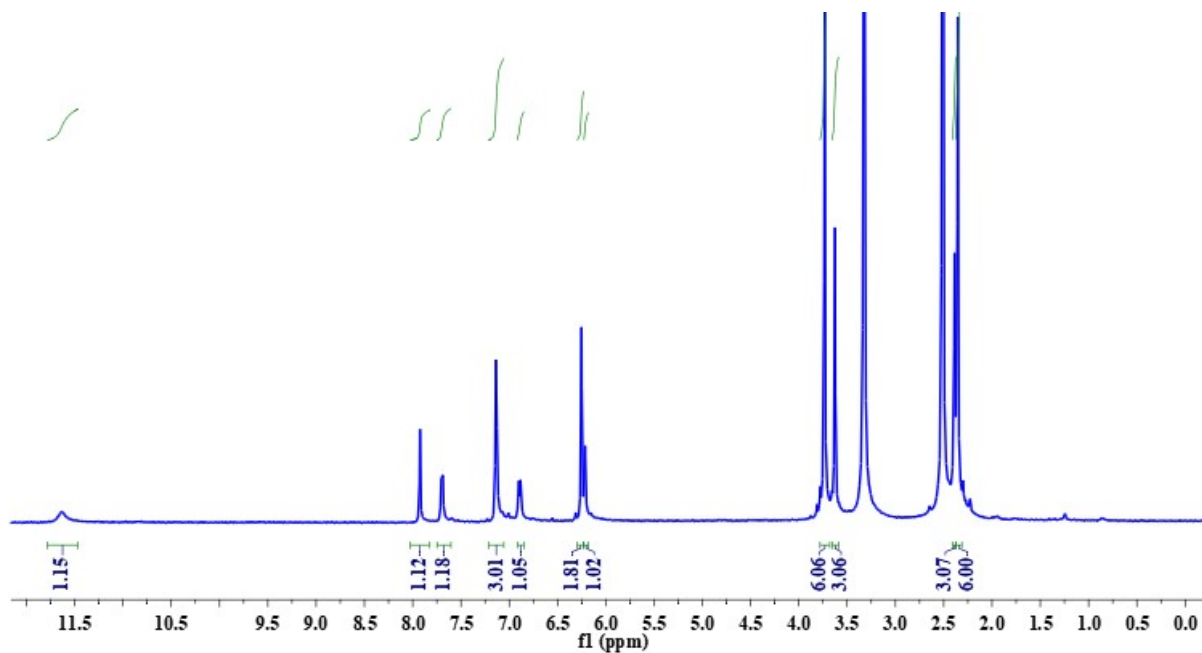

Compound (7c):  $^1\text{H}$  NMR (500 MHz,  $\text{DMSO-}d_6$ )

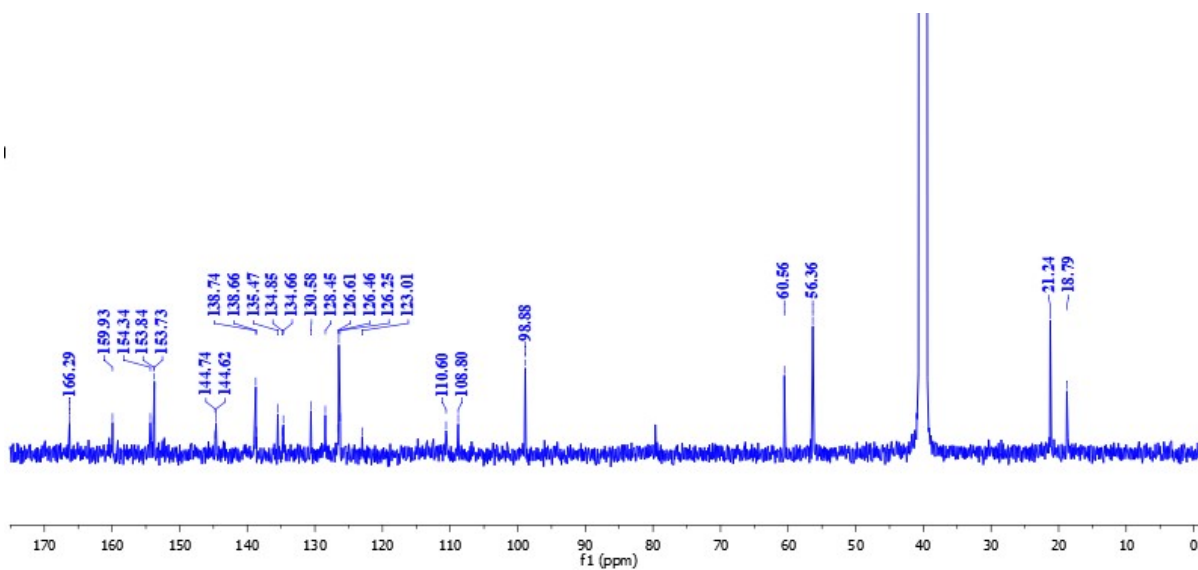

Compound (7c):  $^{13}\text{C}$  NMR (125 MHz,  $\text{DMSO-}d_6$ )

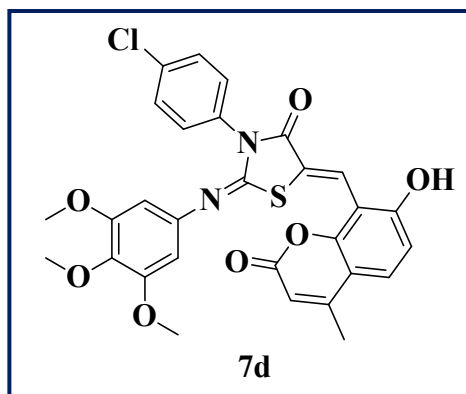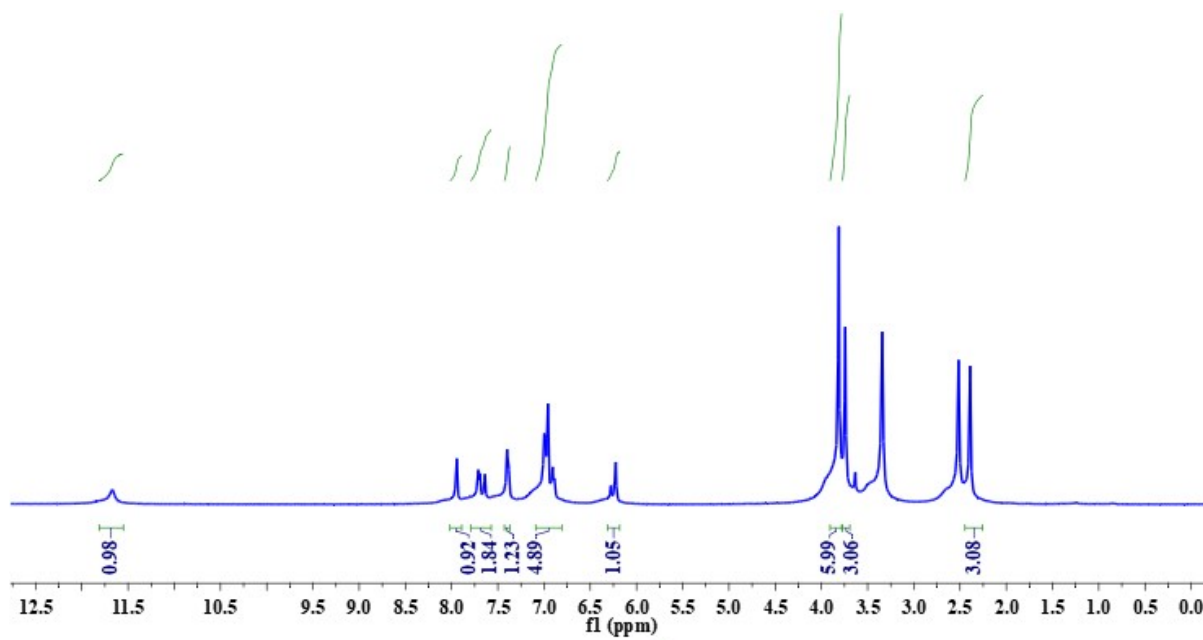

Compound (**7d**): <sup>1</sup>H NMR (500 MHz, DMSO-*d*<sub>6</sub>)

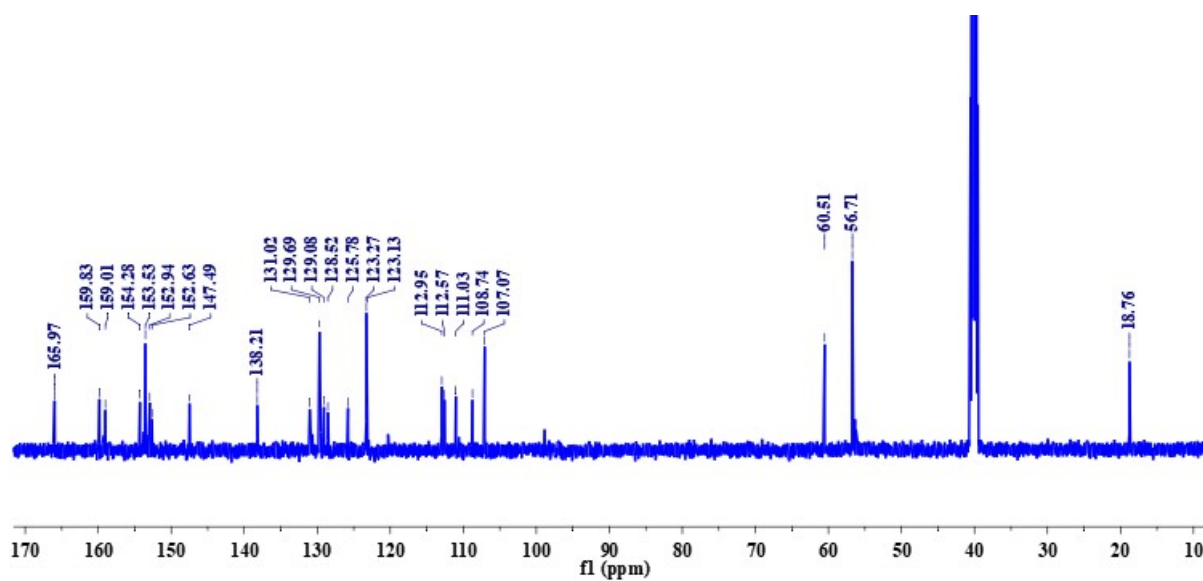

Compound (**7d**): <sup>13</sup>C NMR (125 MHz, DMSO-*d*<sub>6</sub>)

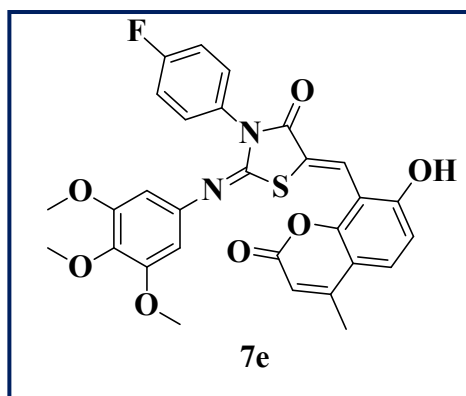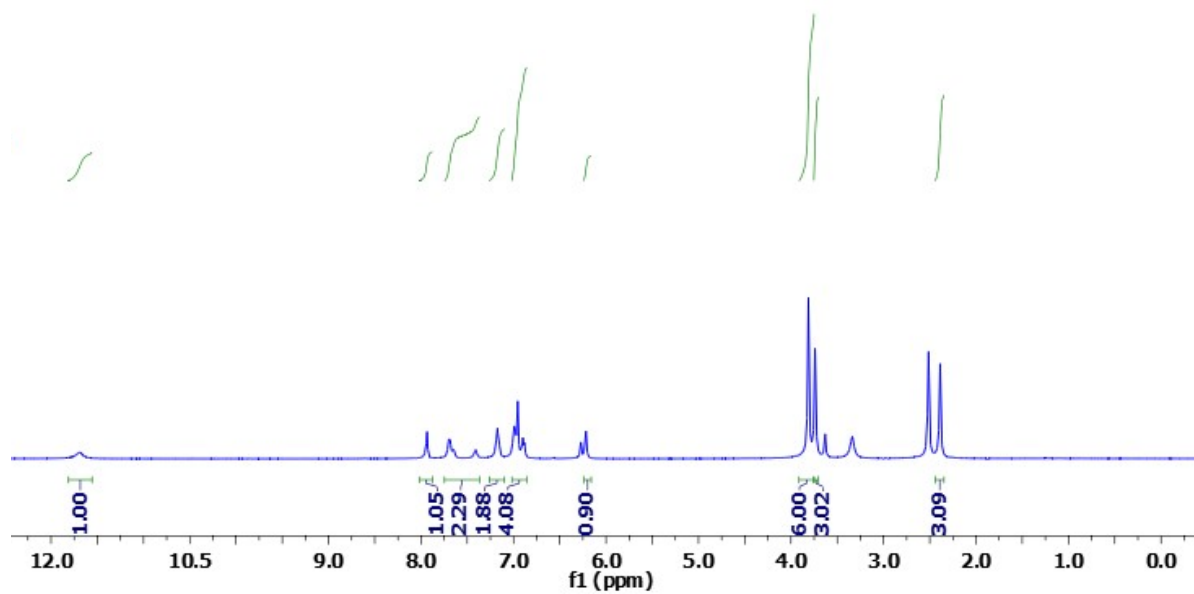

Compound (7e):  $^1\text{H}$  NMR (500 MHz,  $\text{DMSO-}d_6$ )

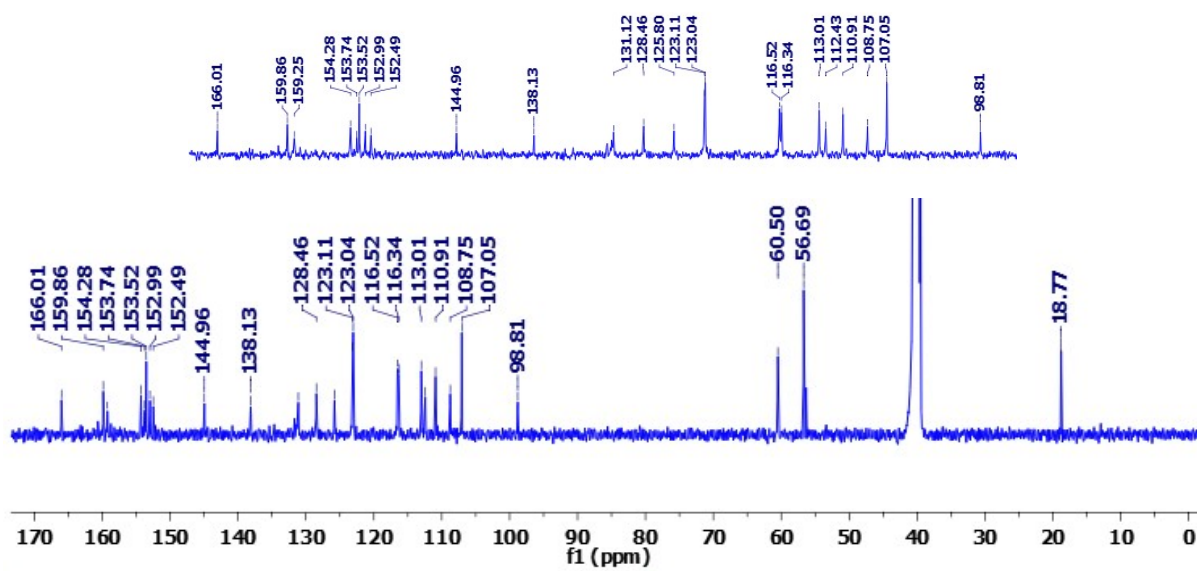

Compound (7e):  $^{13}\text{C}$  NMR (125 MHz,  $\text{DMSO-}d_6$ )

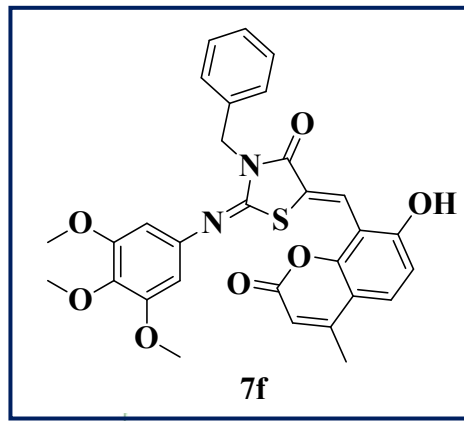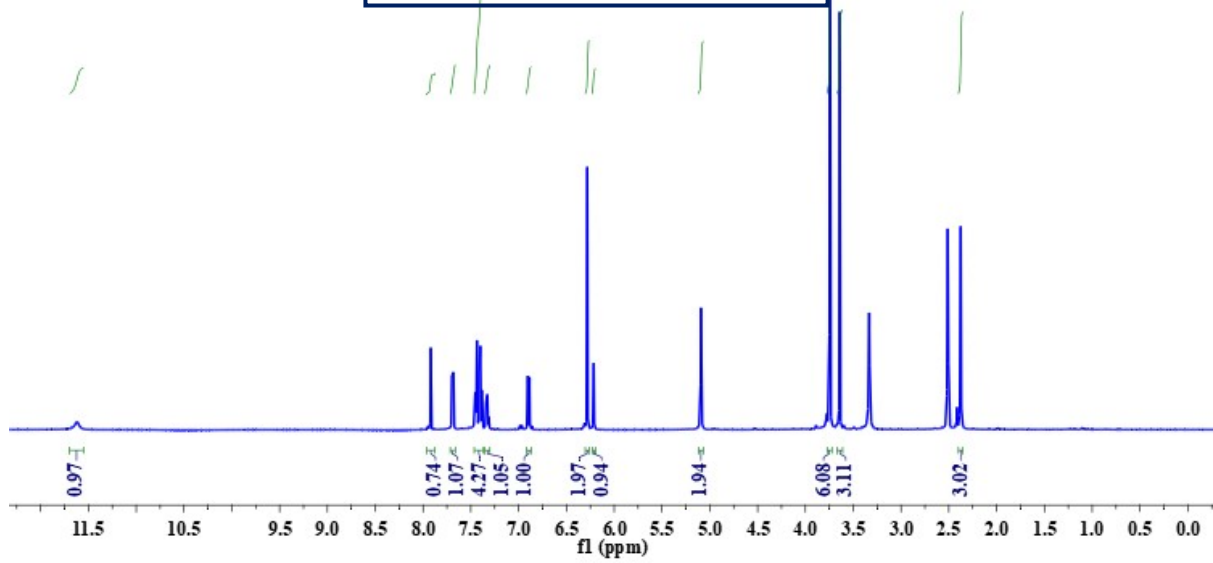

Compound (7f): <sup>1</sup>H NMR (500 MHz, DMSO-*d*<sub>6</sub>)

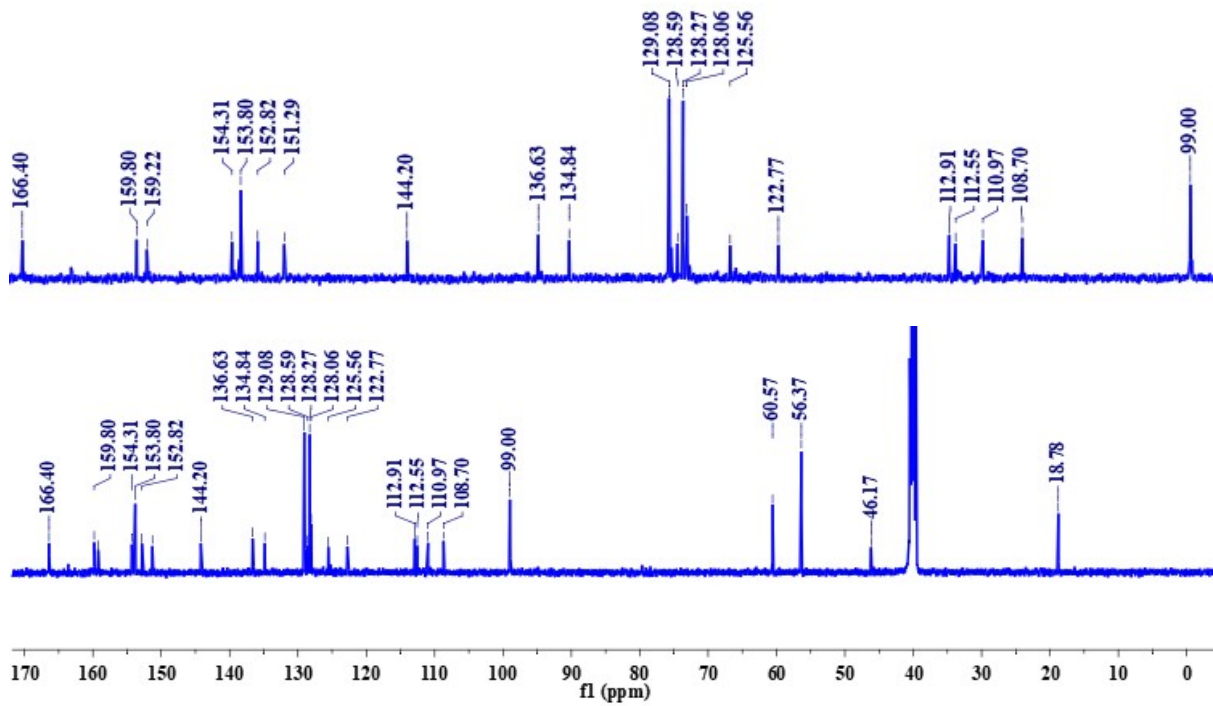

Compound (7f): <sup>13</sup>C NMR (125 MHz, DMSO-*d*<sub>6</sub>)



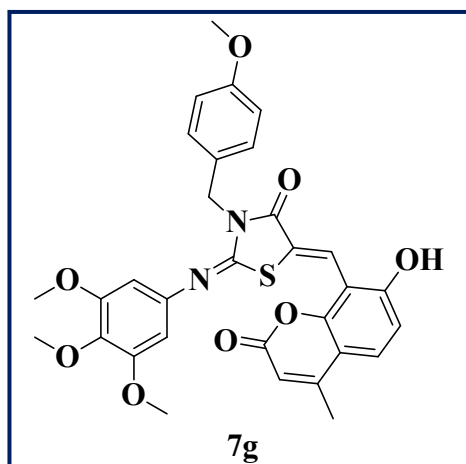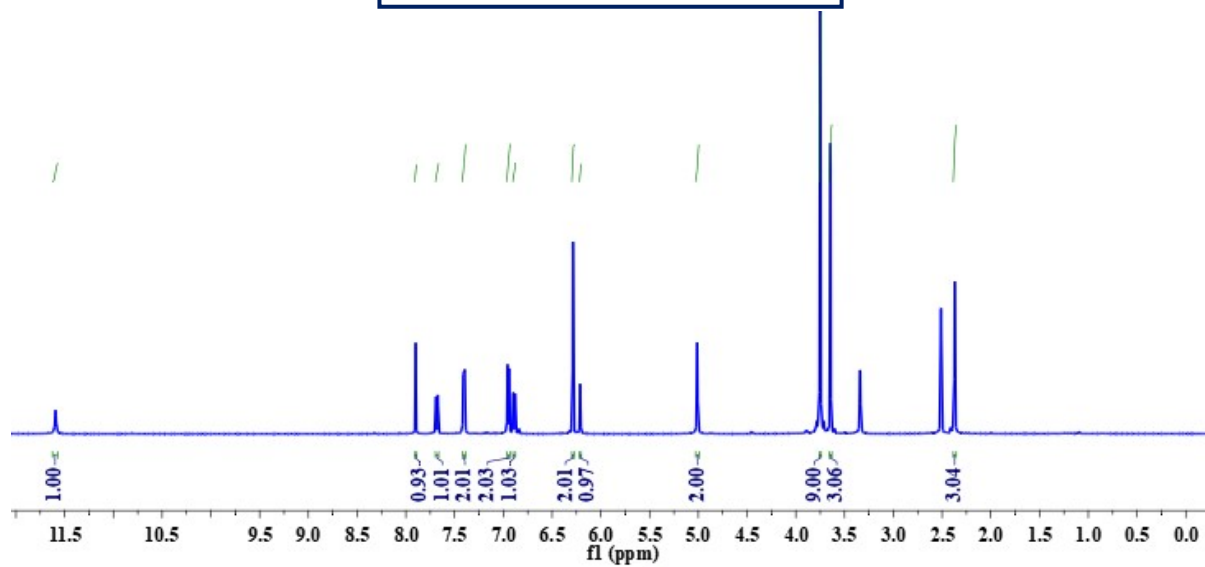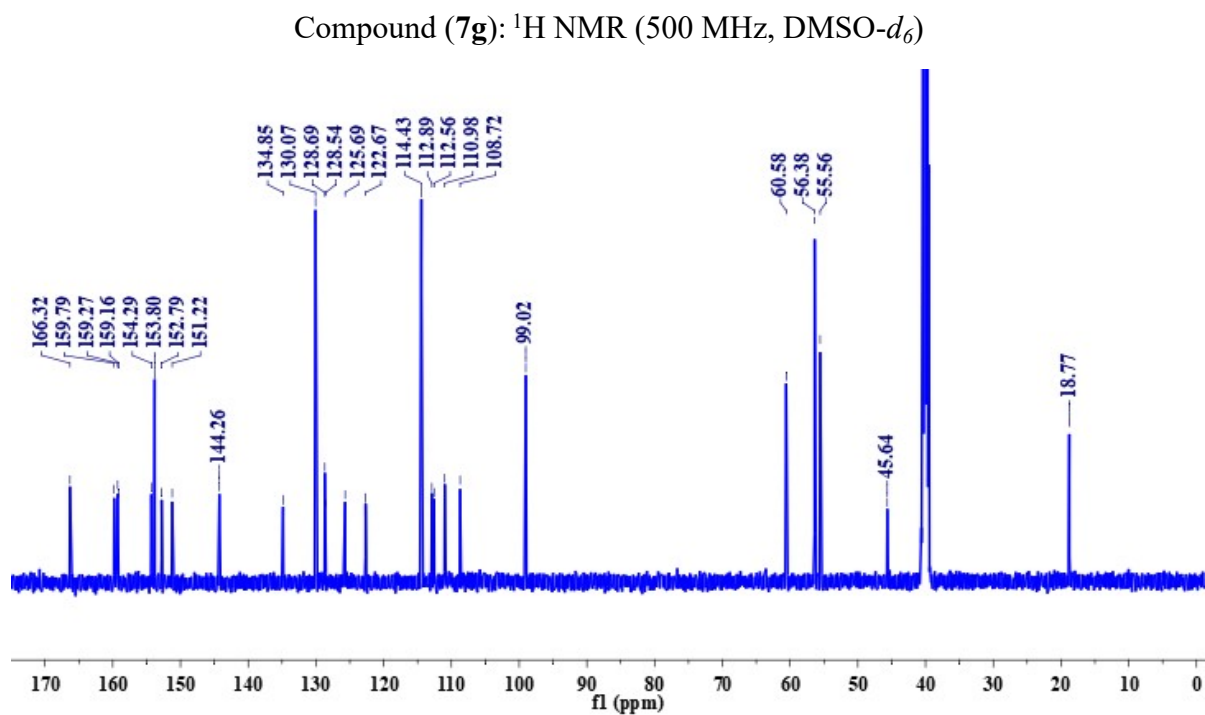

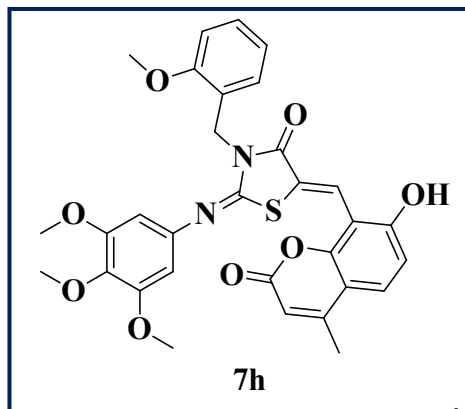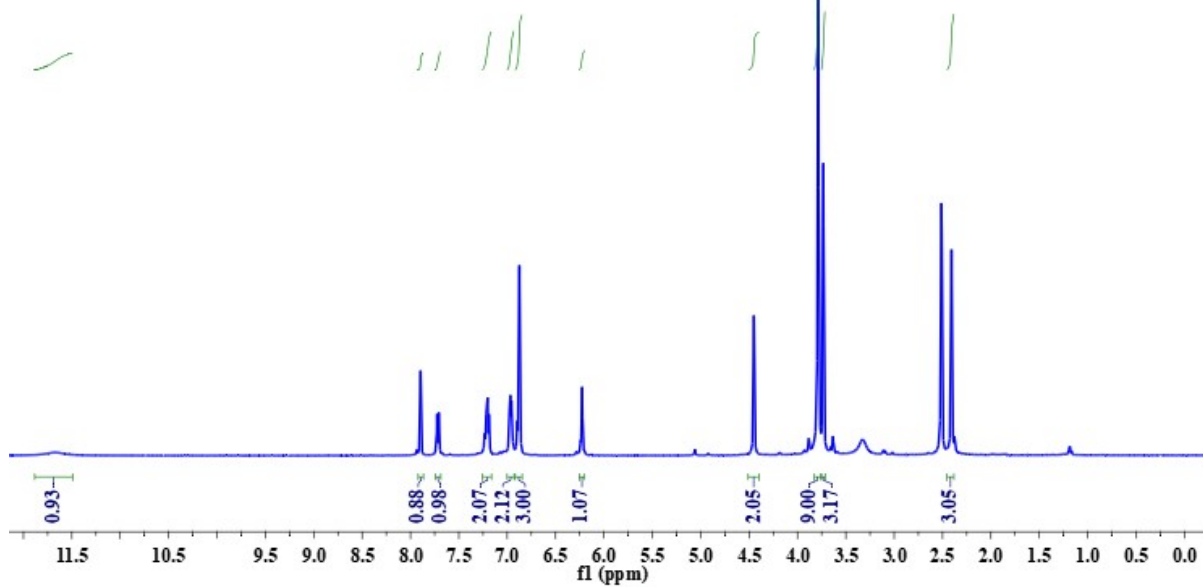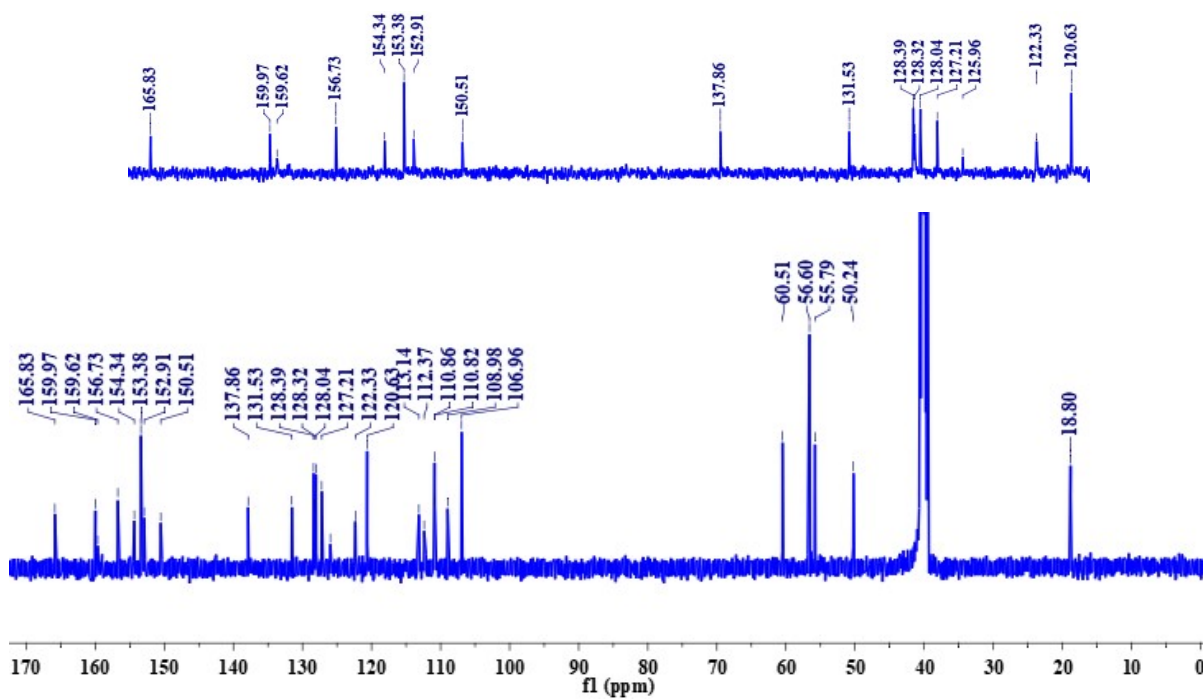

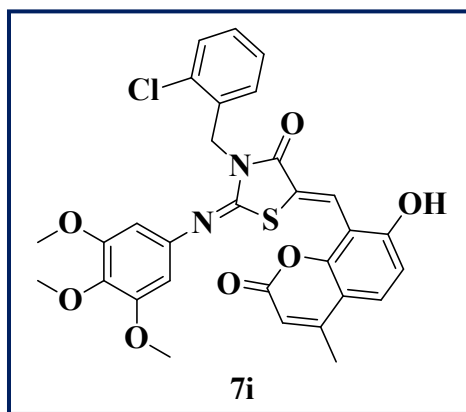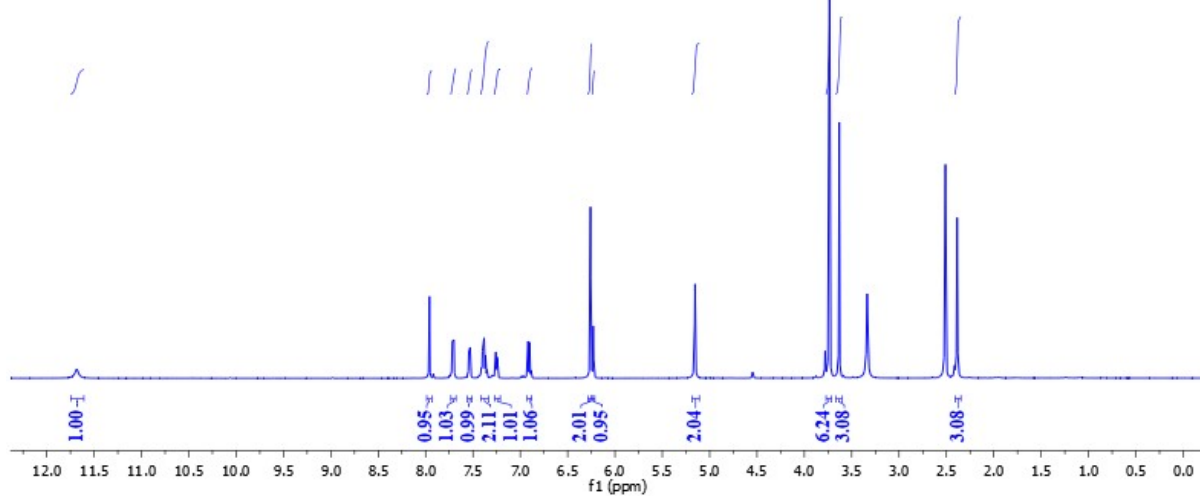

Compound (**7i**):  $^1\text{H}$  NMR (500 MHz,  $\text{DMSO-}d_6$ )

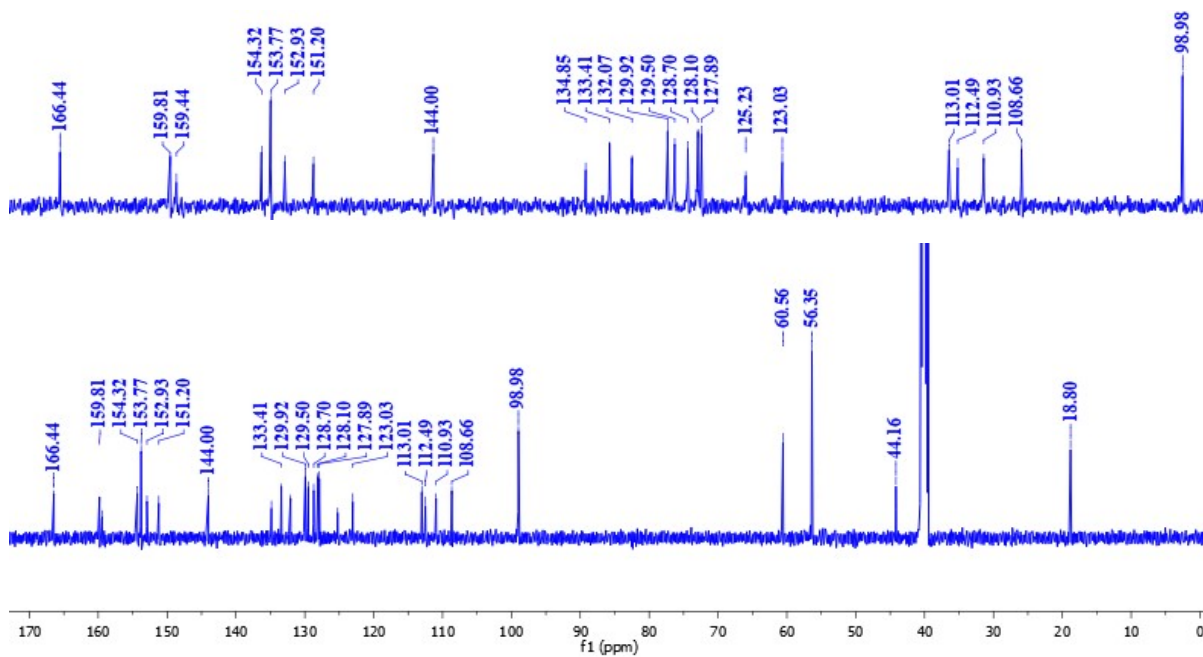

Compound (**7i**):  $^{13}\text{C}$  NMR (125 MHz,  $\text{DMSO-}d_6$ )

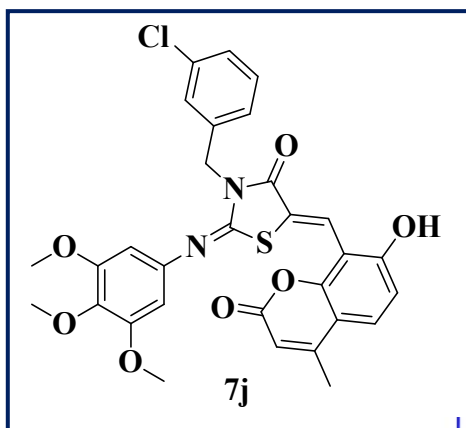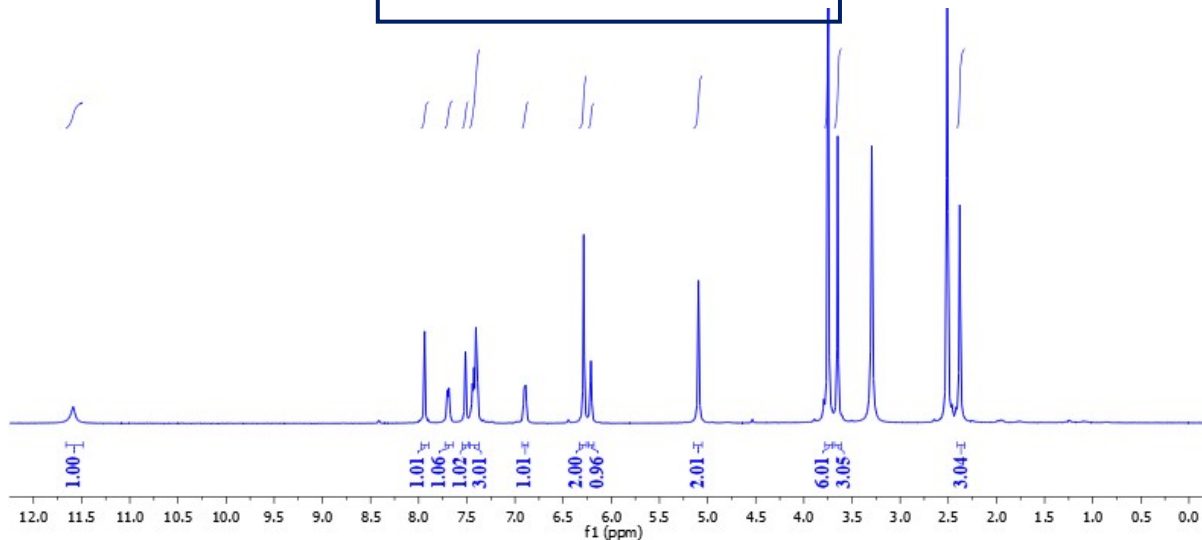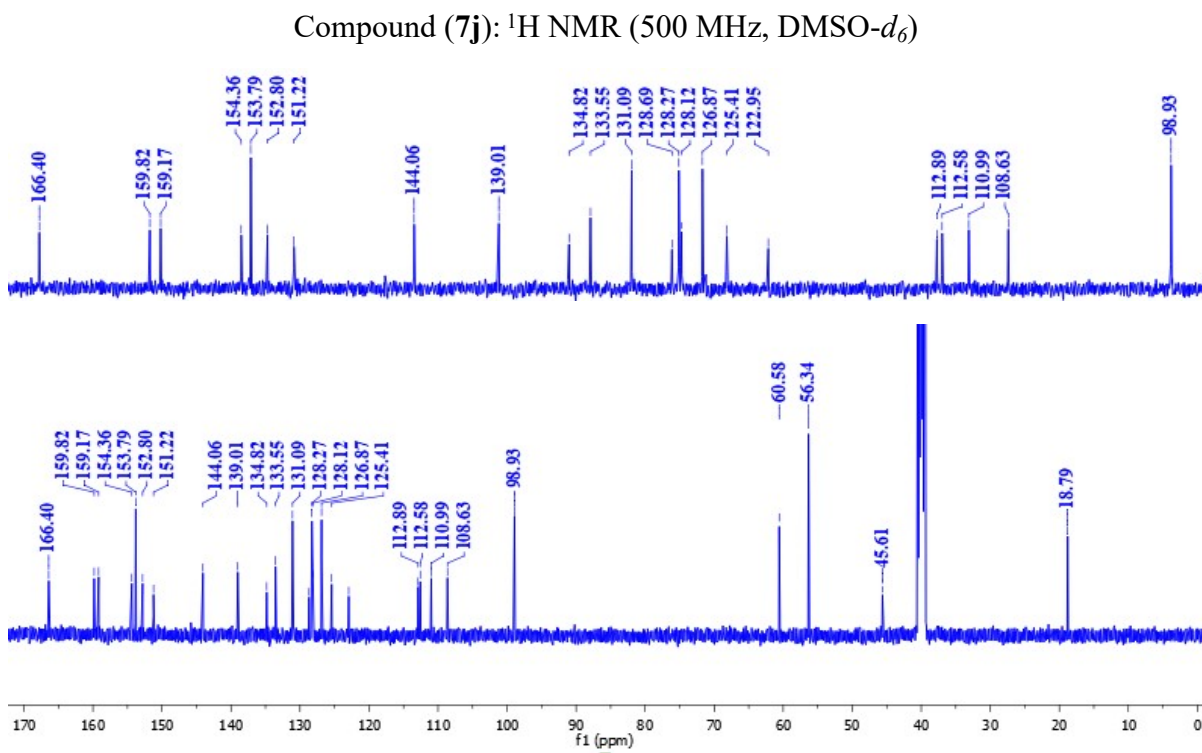

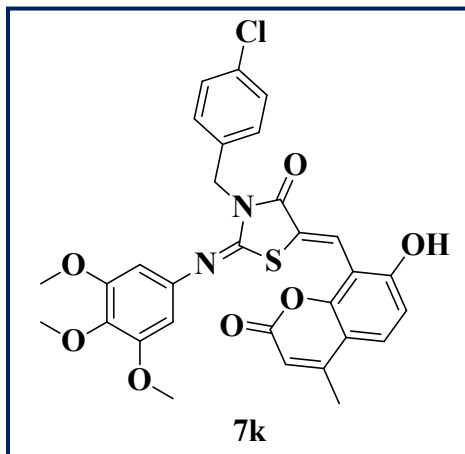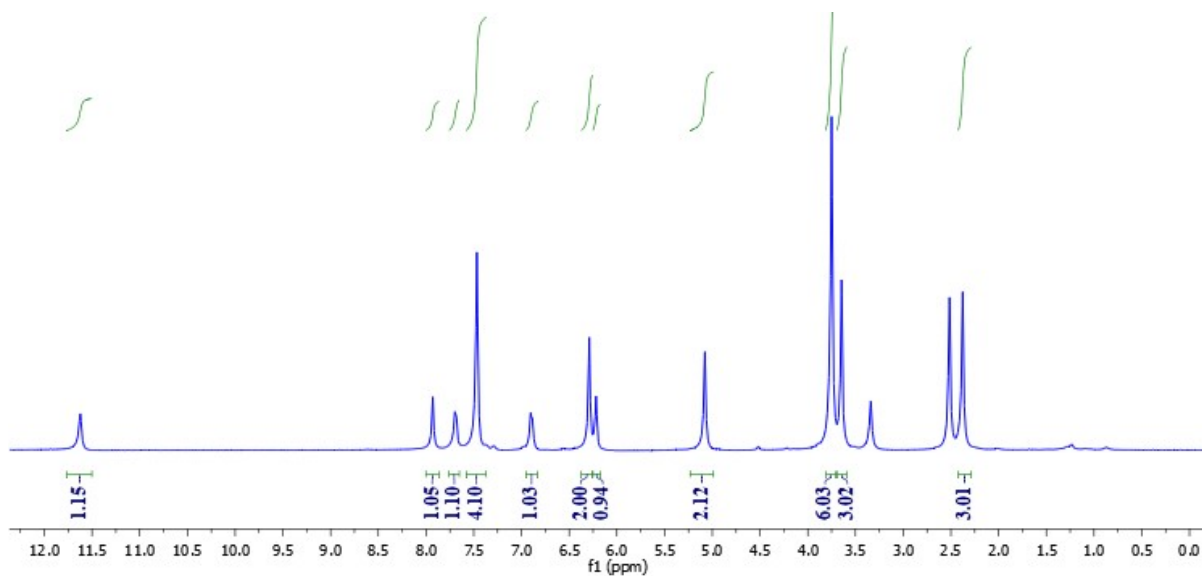

Compound (**7k**): <sup>1</sup>H NMR (500 MHz, DMSO-*d*<sub>6</sub>)

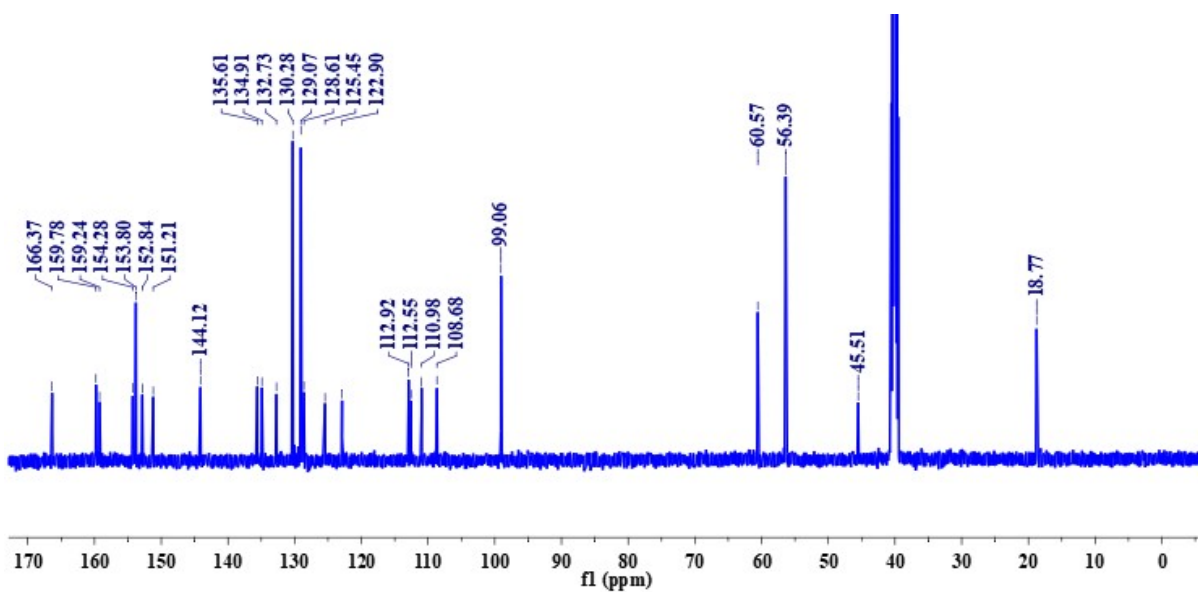

Compound (**7k**): <sup>13</sup>C NMR (125 MHz, DMSO-*d*<sub>6</sub>)

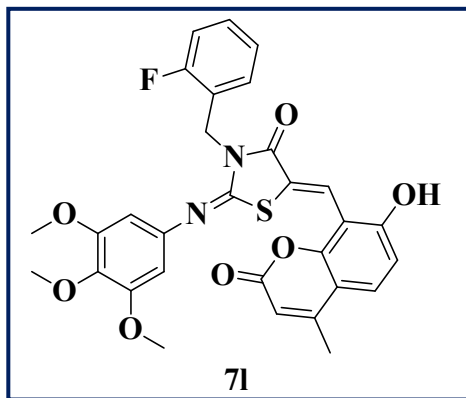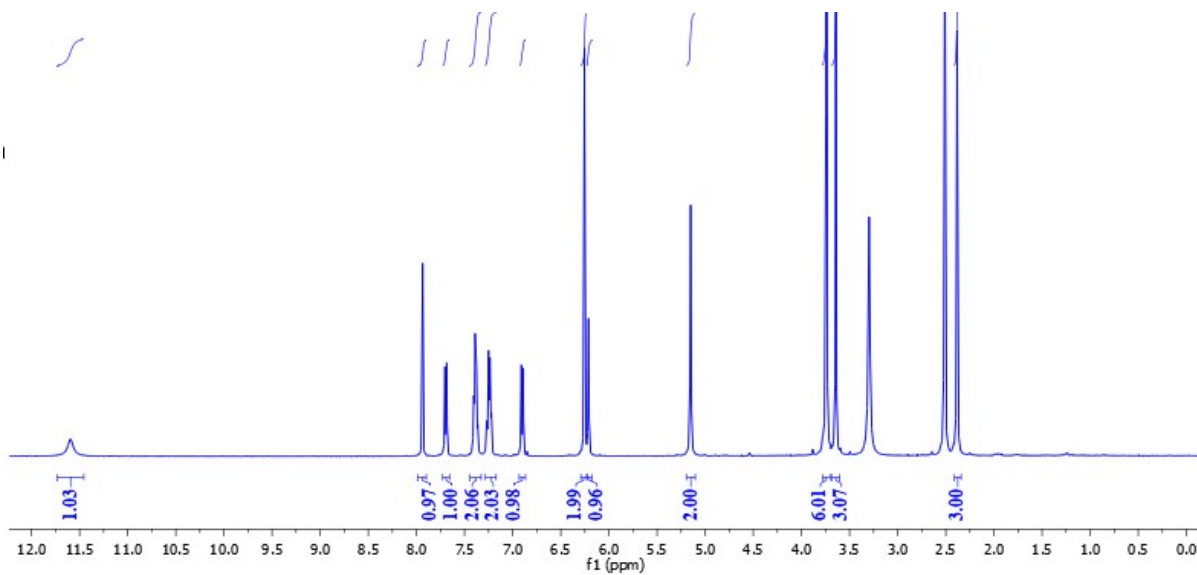

Compound (**7I**):  $^1\text{H}$  NMR (500 MHz,  $\text{DMSO-}d_6$ )

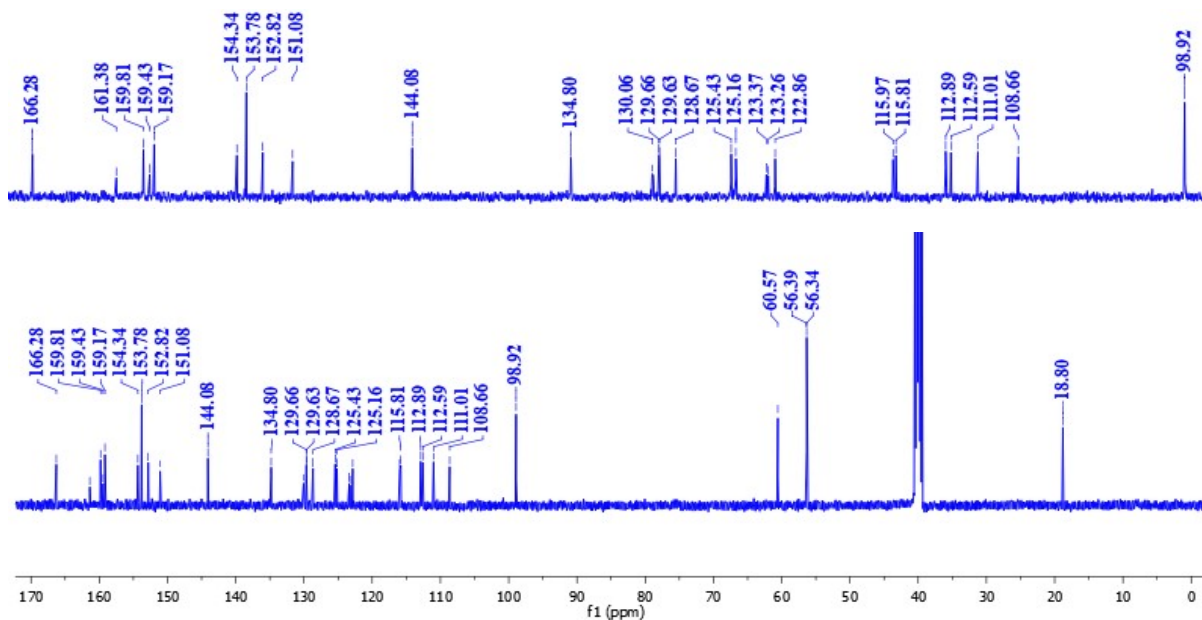

Compound (**7I**):  $^{13}\text{C}$  NMR (125 MHz,  $\text{DMSO-}d_6$ )

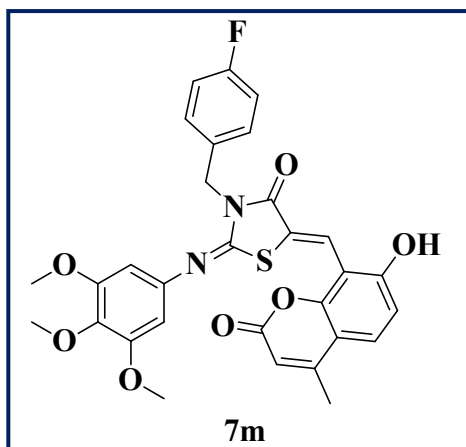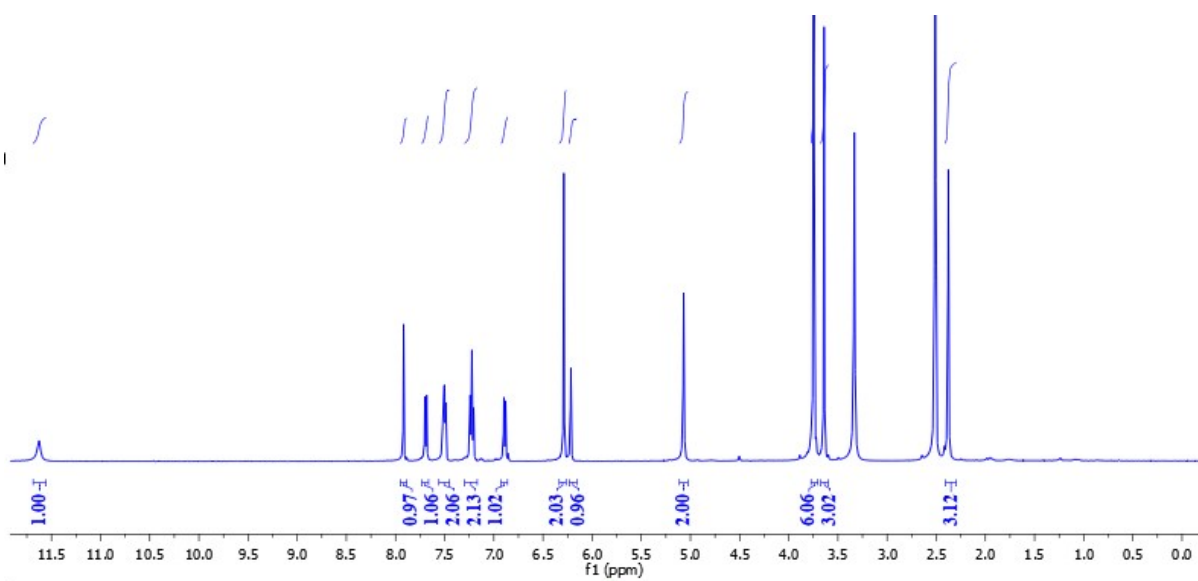

Compound (**7m**):  $^1\text{H}$  NMR (500 MHz,  $\text{DMSO-}d_6$ )

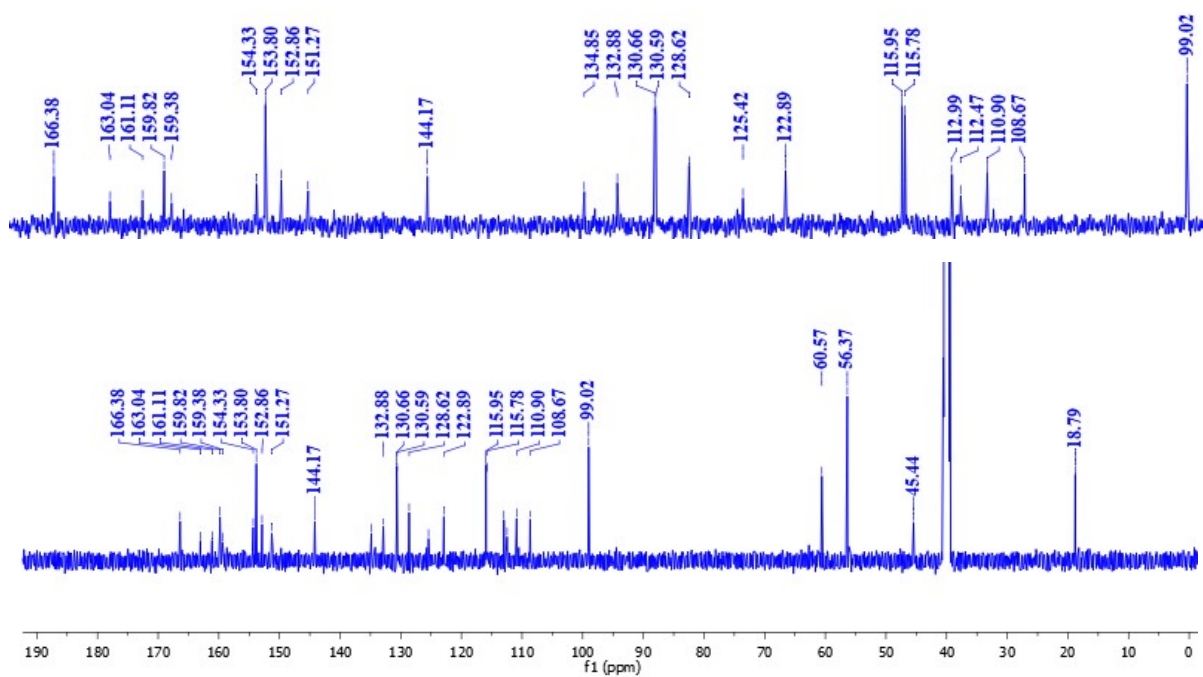

Compound (**7m**):  $^{13}\text{C}$  NMR (125 MHz,  $\text{DMSO-}d_6$ )

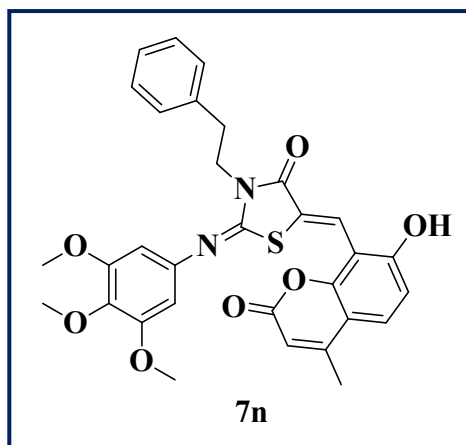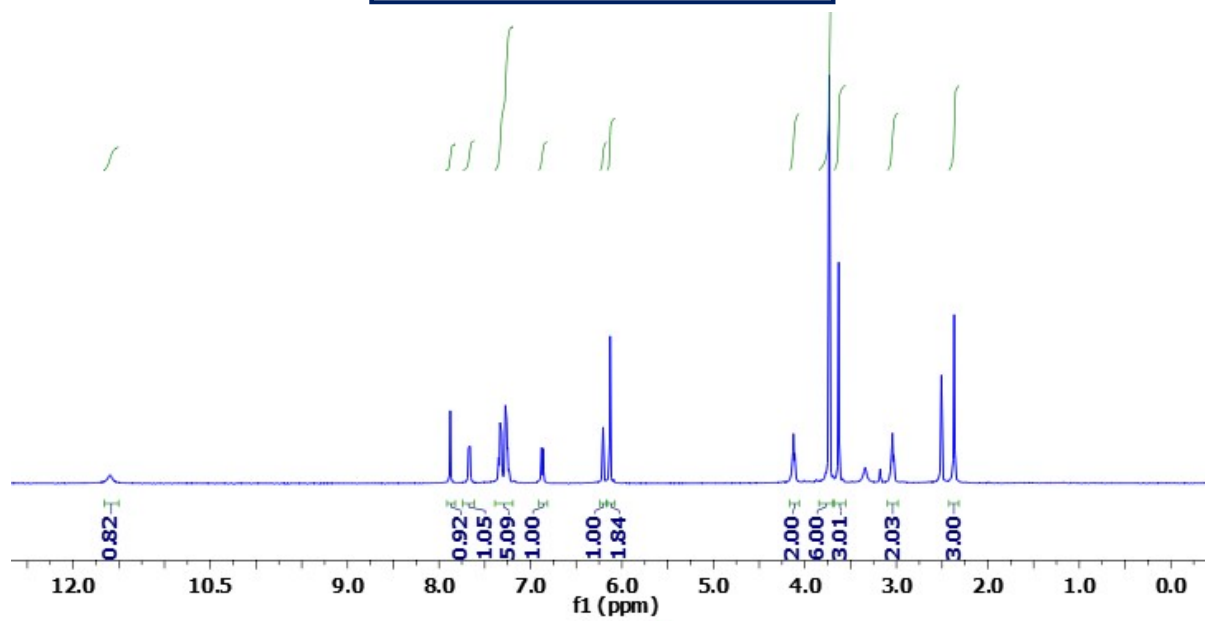

Compound (7n):  $^1\text{H}$  NMR (500 MHz,  $\text{DMSO-}d_6$ )

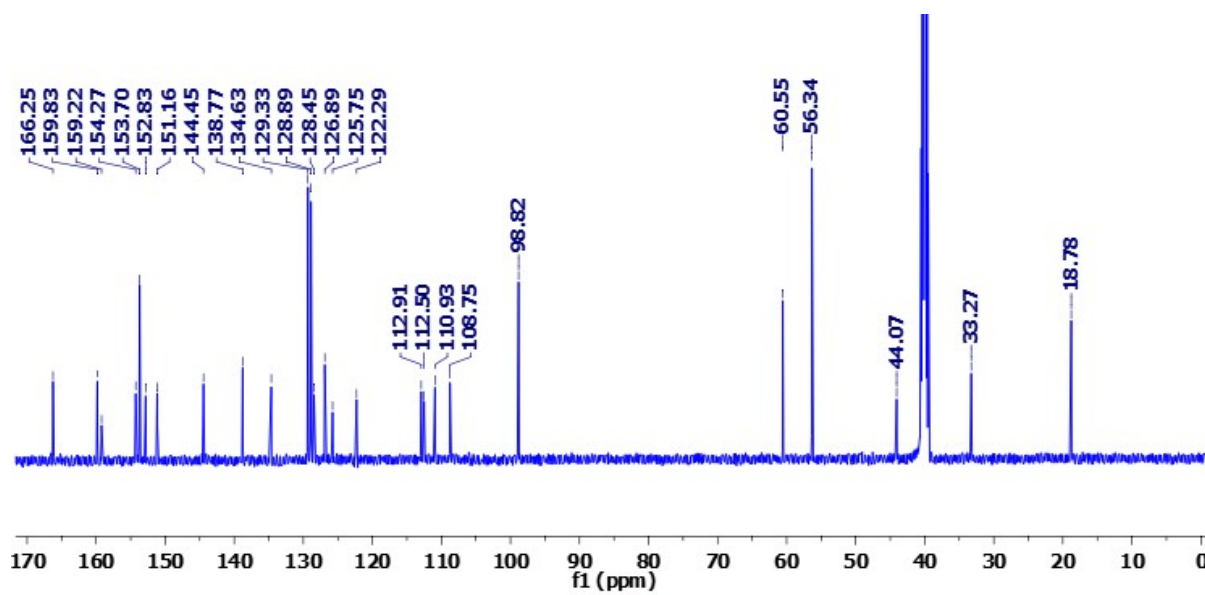

Compound (7n):  $^{13}\text{C}$  NMR (125 MHz,  $\text{DMSO-}d_6$ )



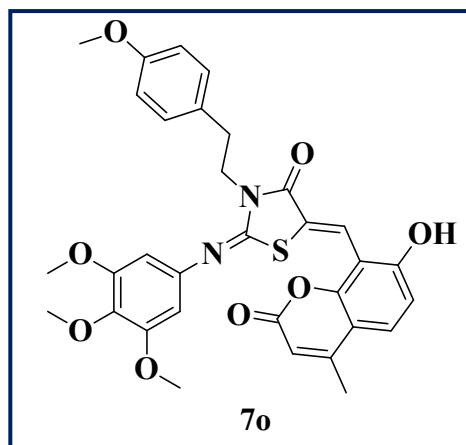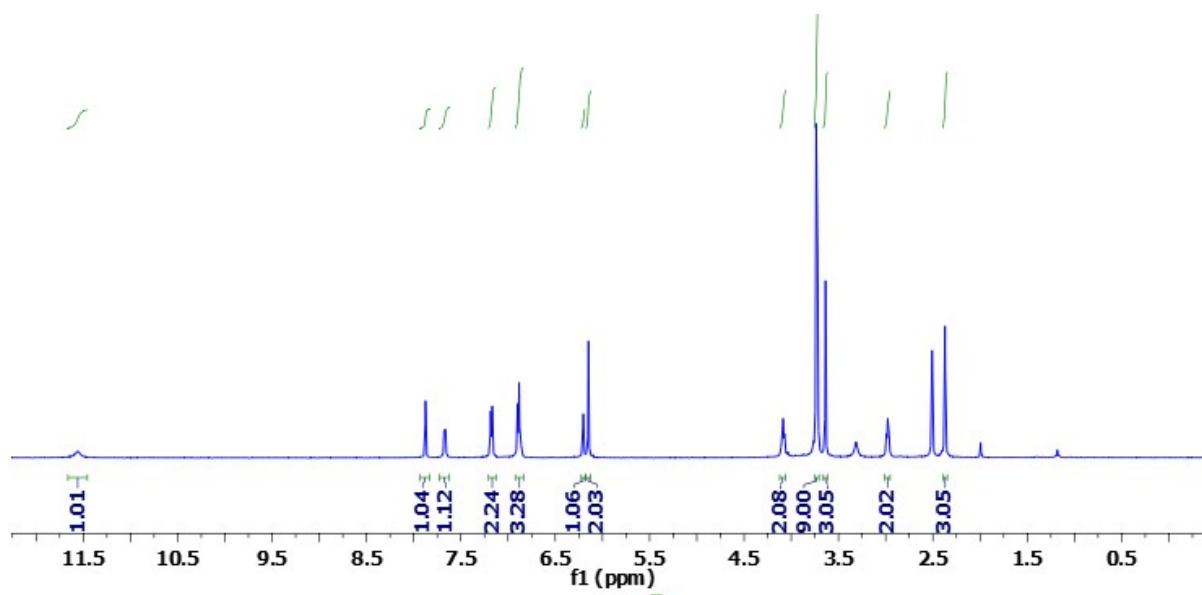

Compound (**7o**):  $^1\text{H}$  NMR (500 MHz,  $\text{DMSO-}d_6$ )

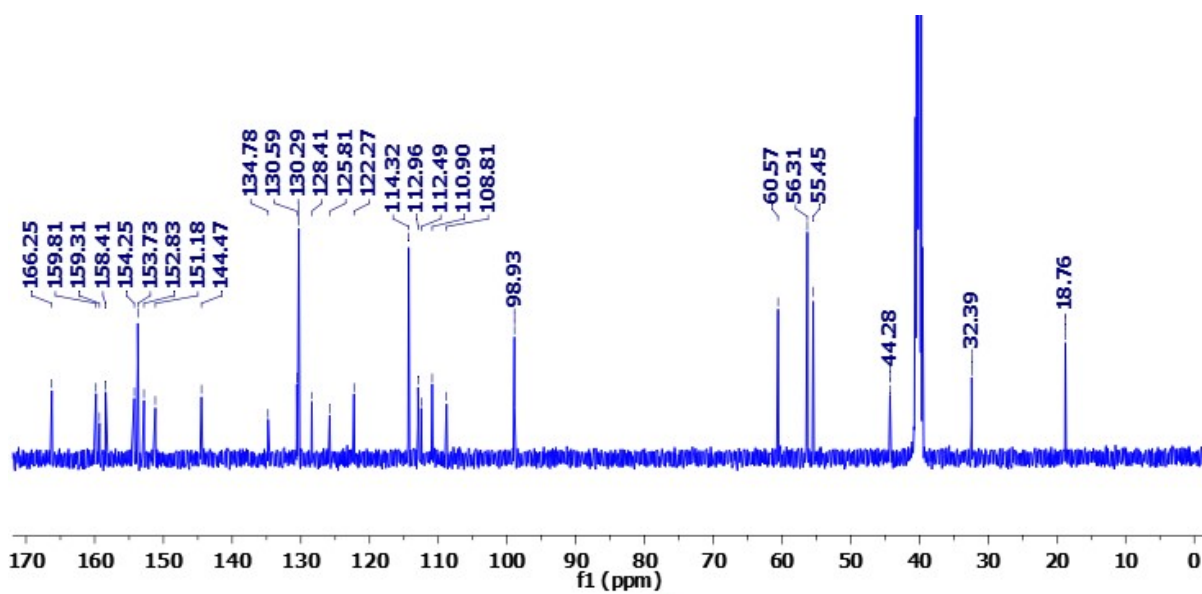

Compound (**7o**):  $^{13}\text{C}$  NMR (125 MHz,  $\text{DMSO-}d_6$ )

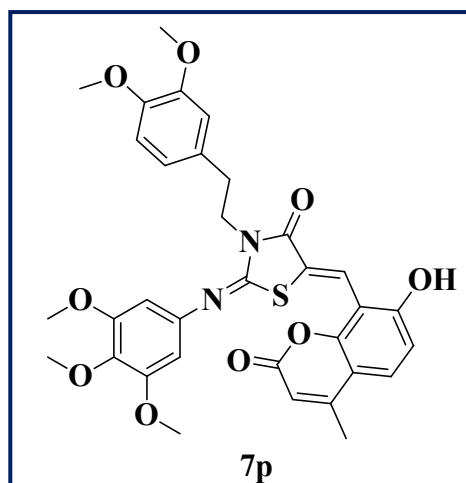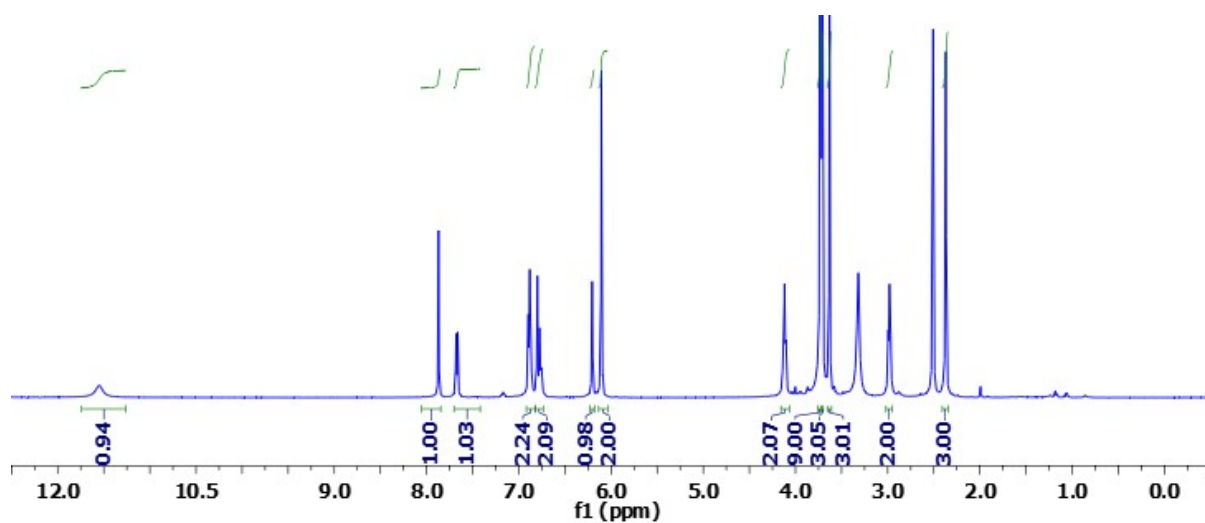

Compound (**7p**):  $^1\text{H}$  NMR (500 MHz,  $\text{DMSO-}d_6$ )

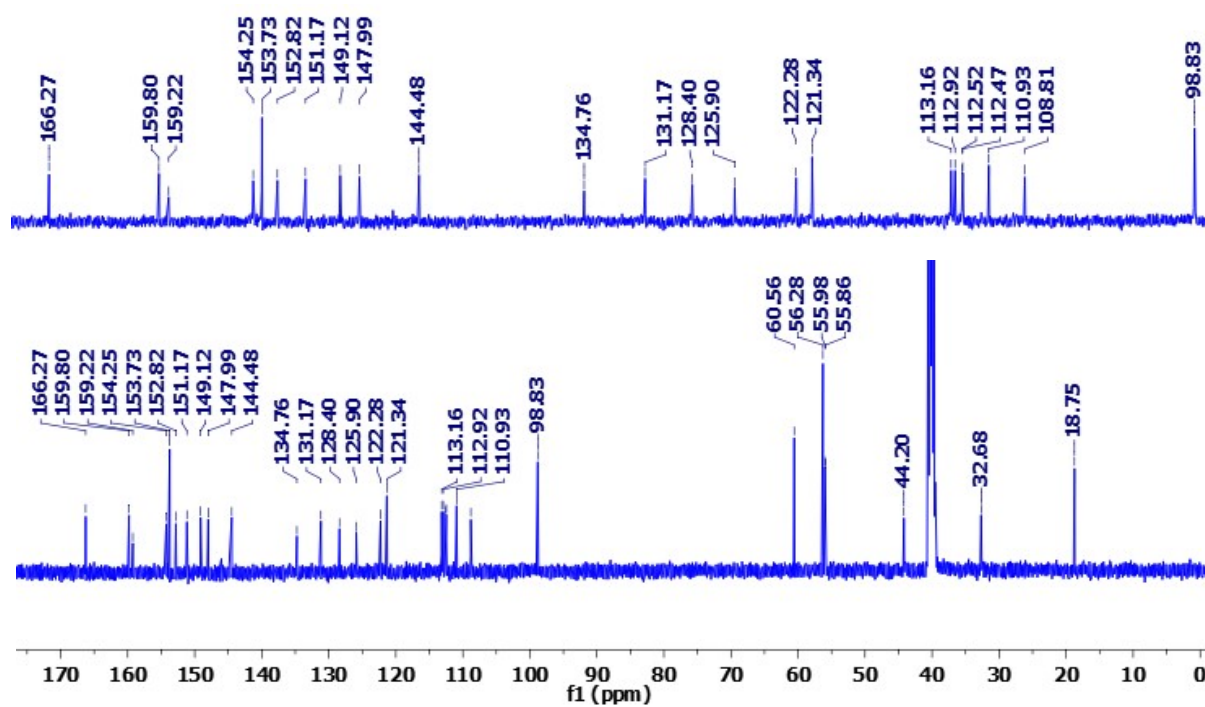

Compound (**7p**):  $^{13}\text{C}$  NMR (125 MHz,  $\text{DMSO-}d_6$ )

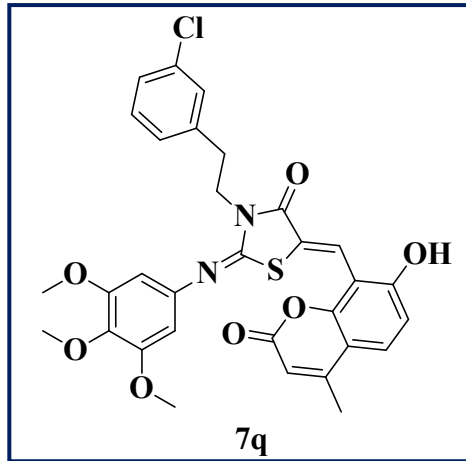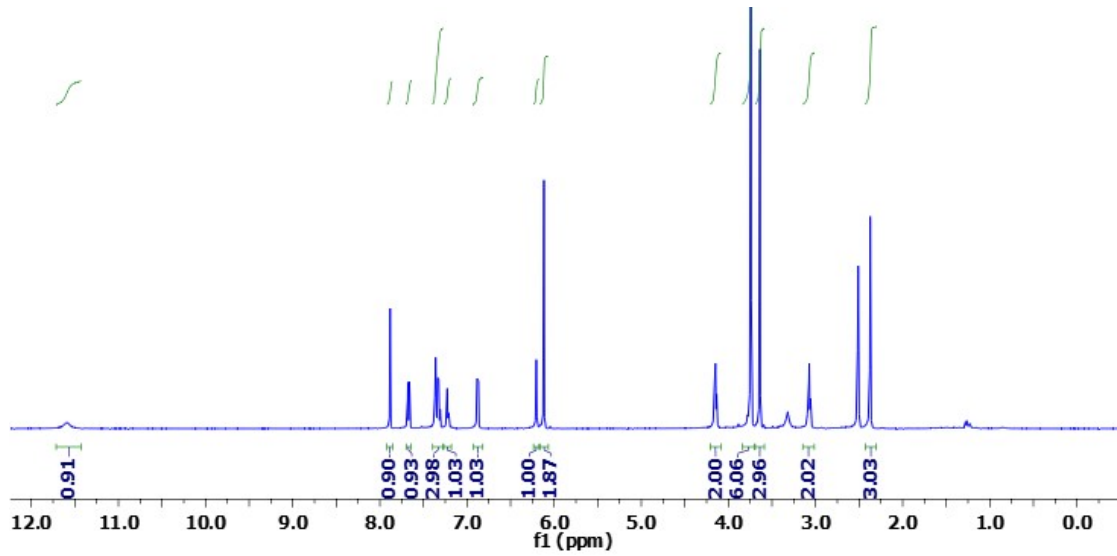

Compound (7q): <sup>1</sup>H NMR (500 MHz, DMSO-*d*<sub>6</sub>)

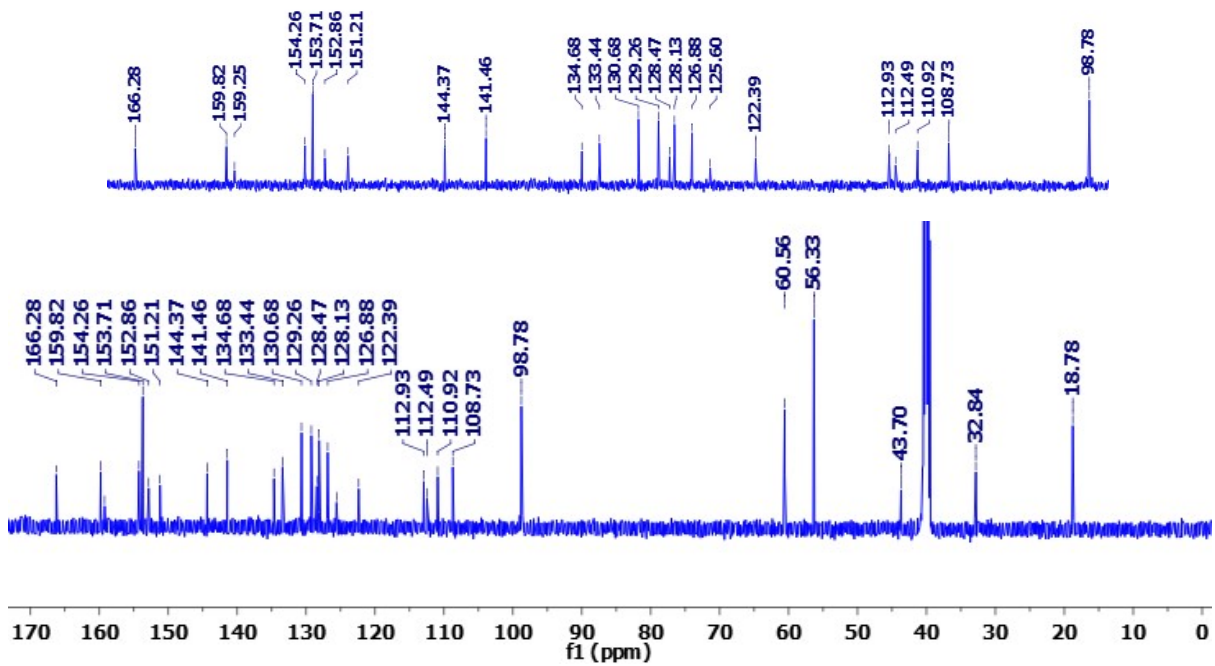

Compound (7q): <sup>13</sup>C NMR (125 MHz, DMSO-*d*<sub>6</sub>)

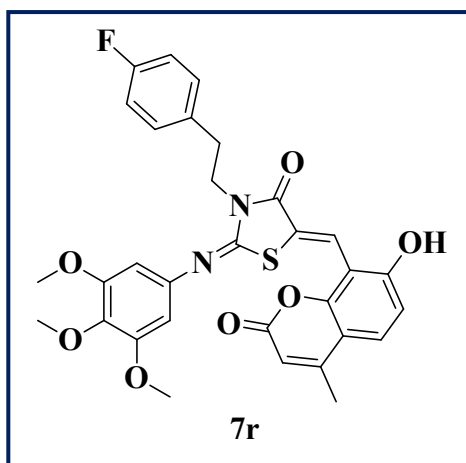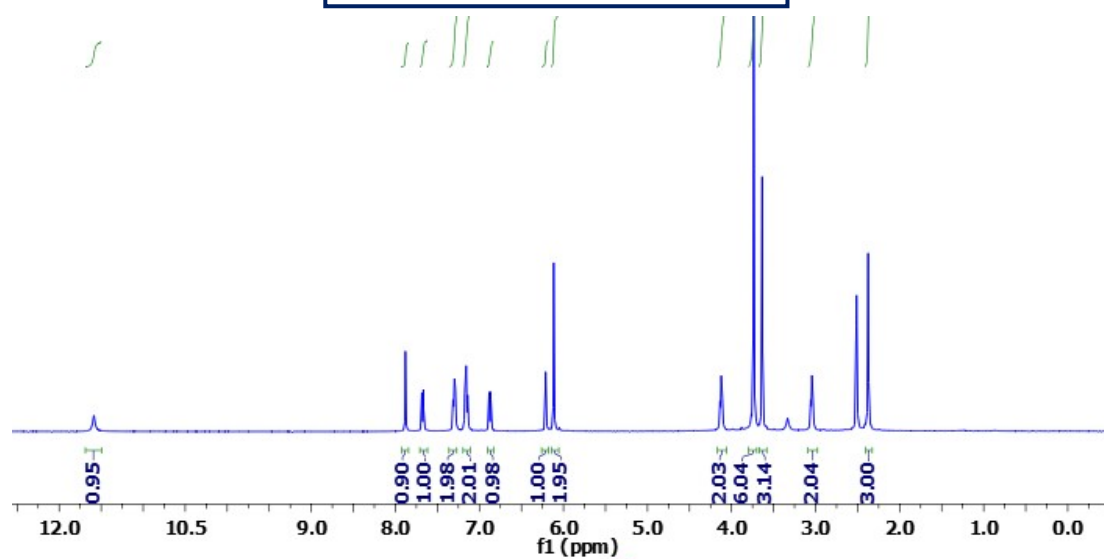

Compound (7r): <sup>1</sup>H NMR (500 MHz, DMSO-*d*<sub>6</sub>)

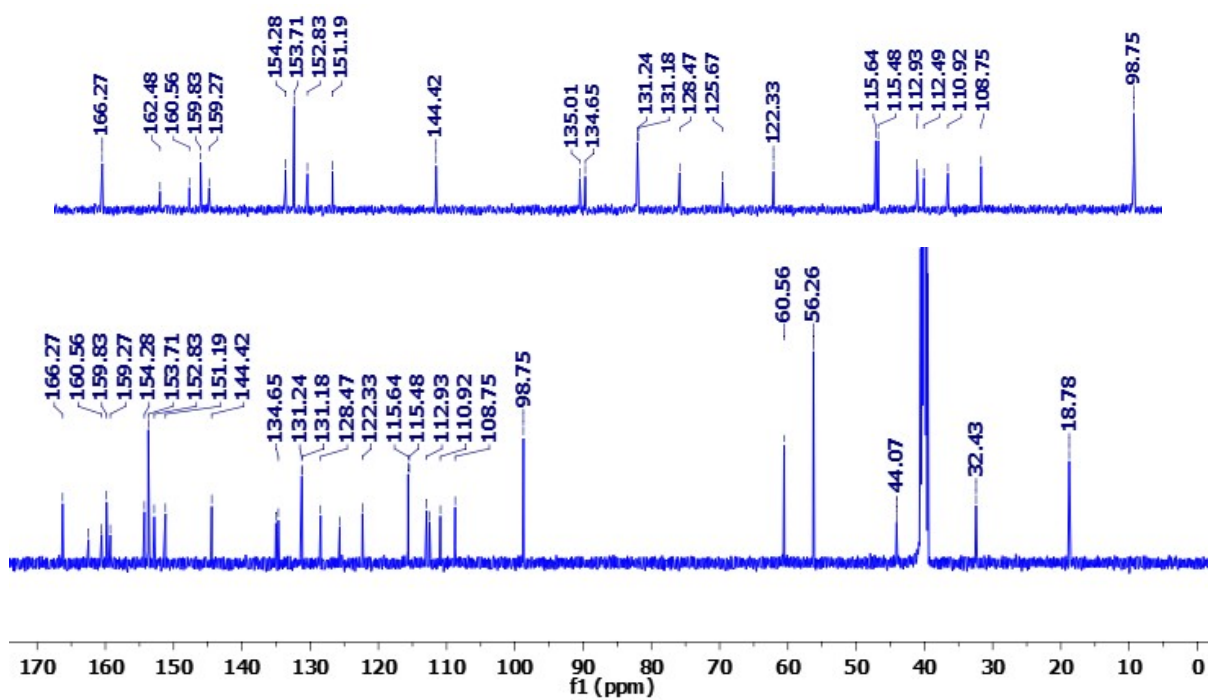

Compound (7r): <sup>13</sup>C NMR (125 MHz, DMSO-*d*<sub>6</sub>)

## Copies of Mass spectra

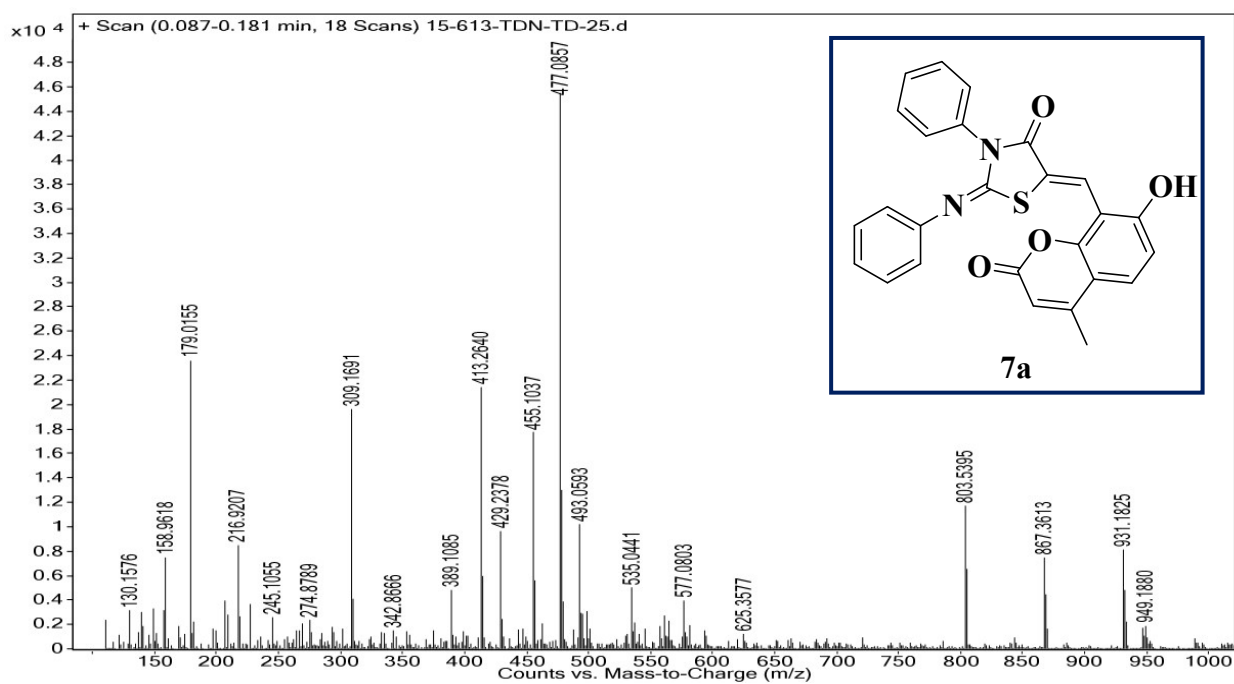

Compound (7a)

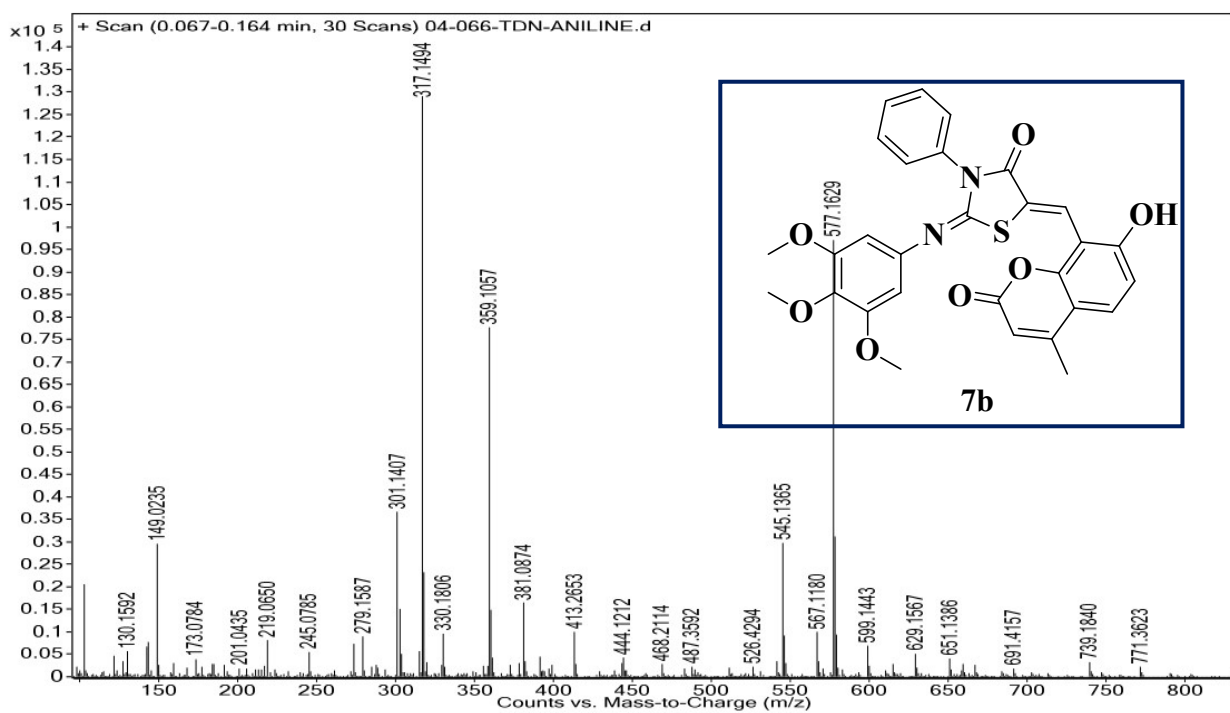

Compound (7b)

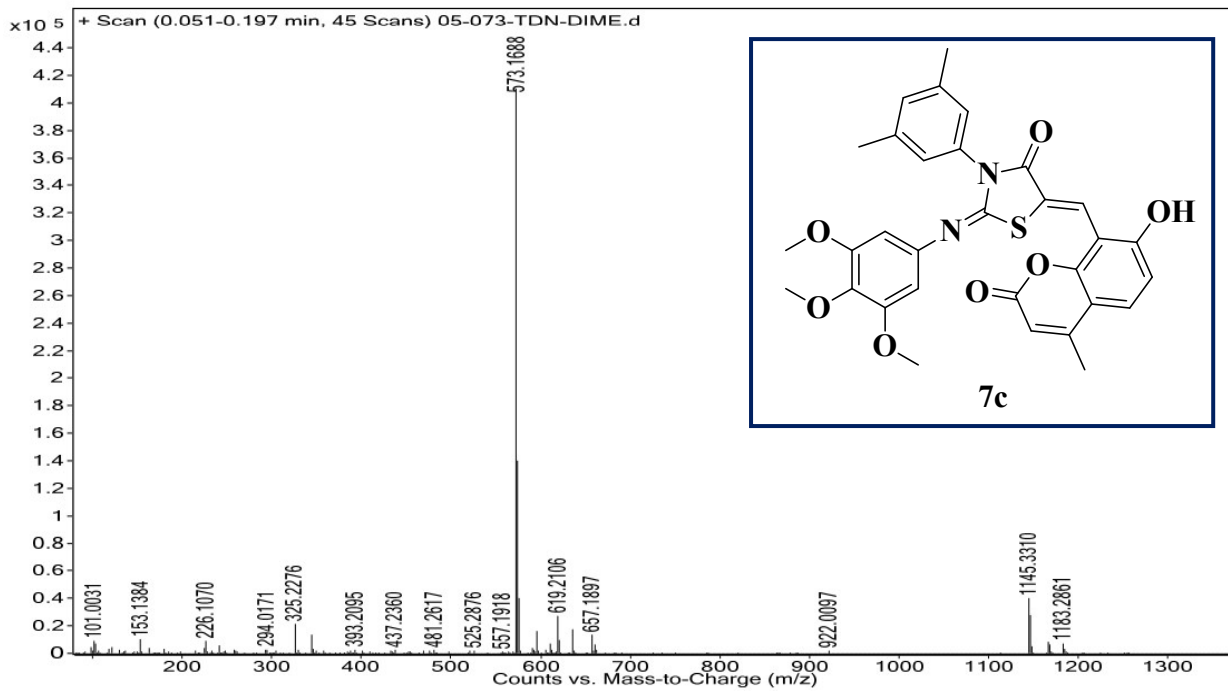

Compound (7c)

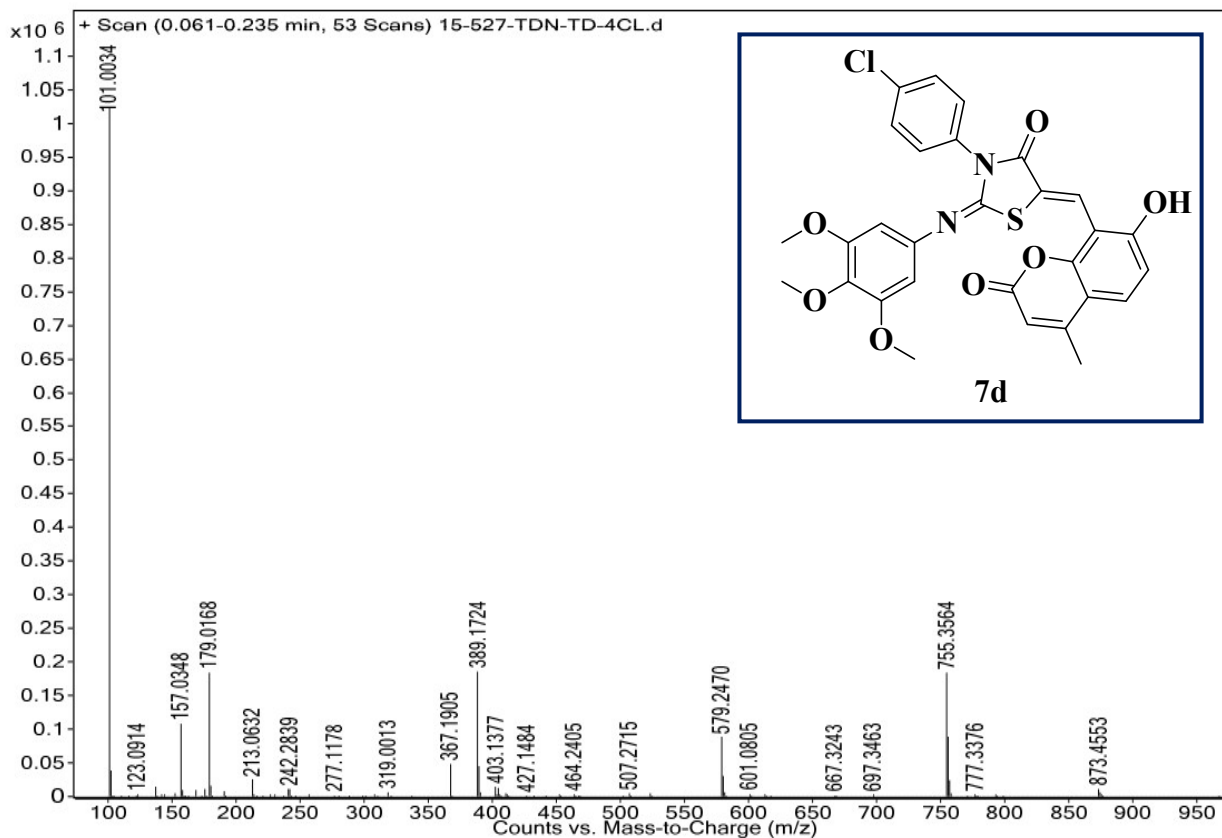

Compound (7d)

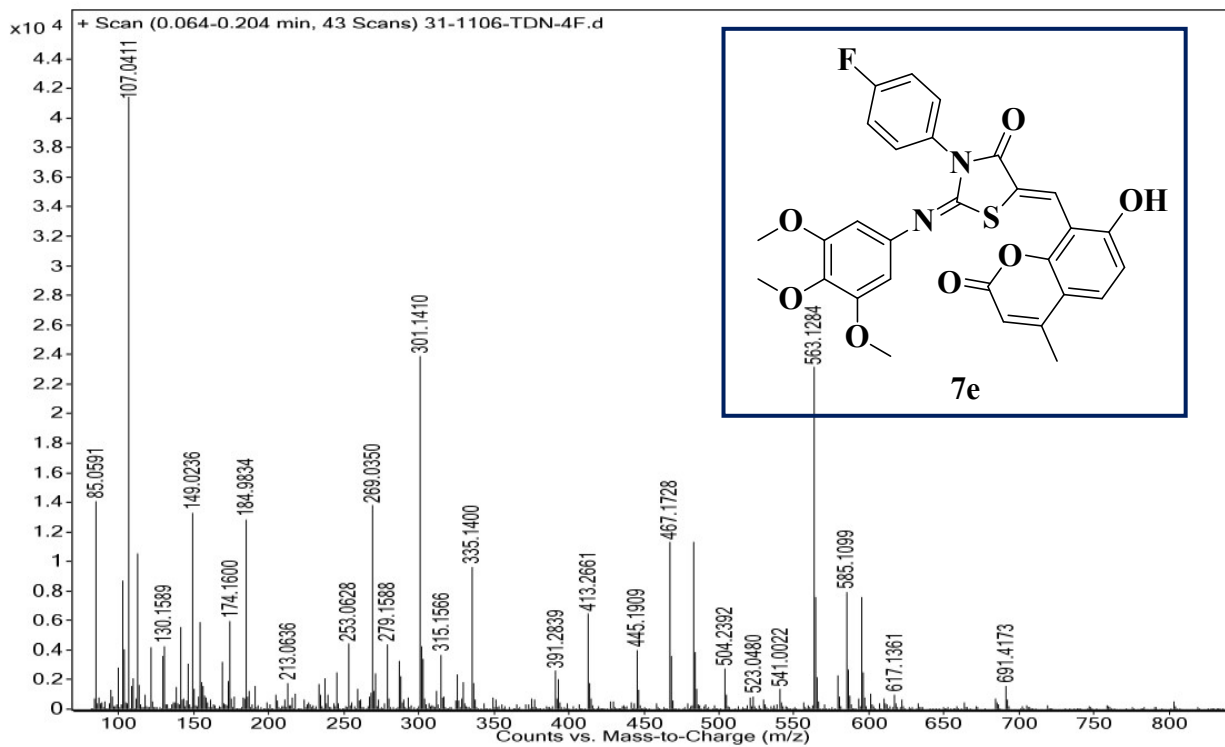

Compound (7e)

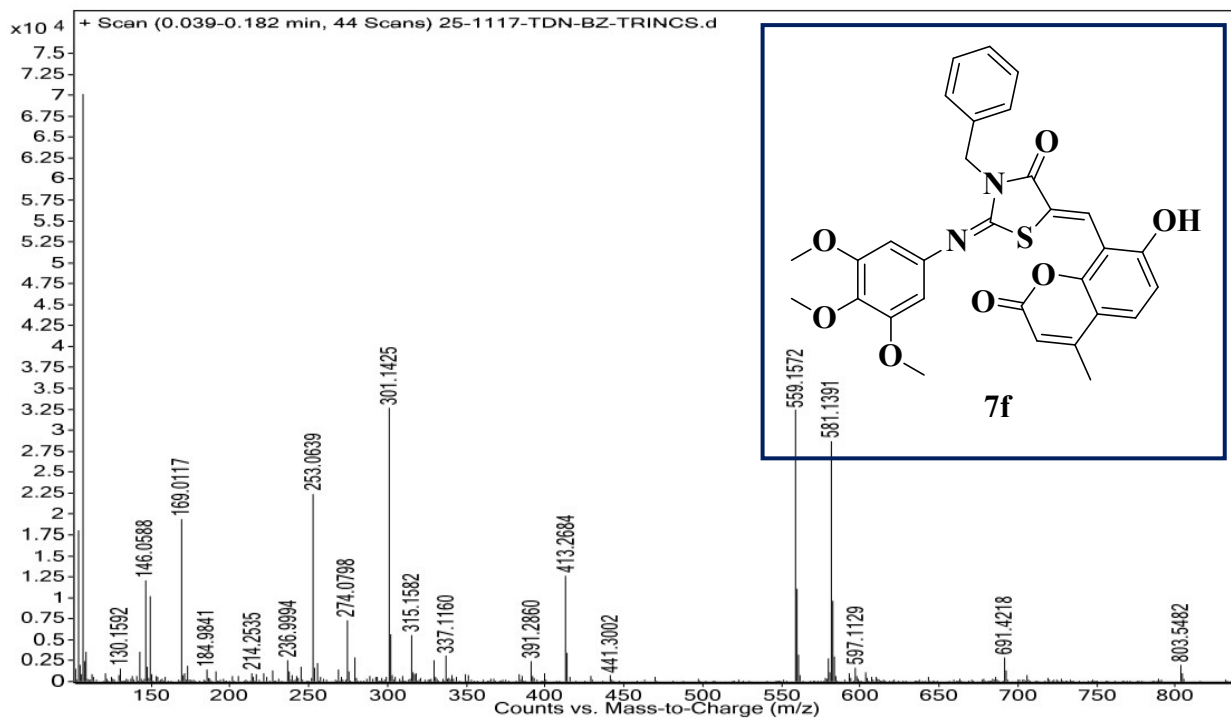

Compound (7f)

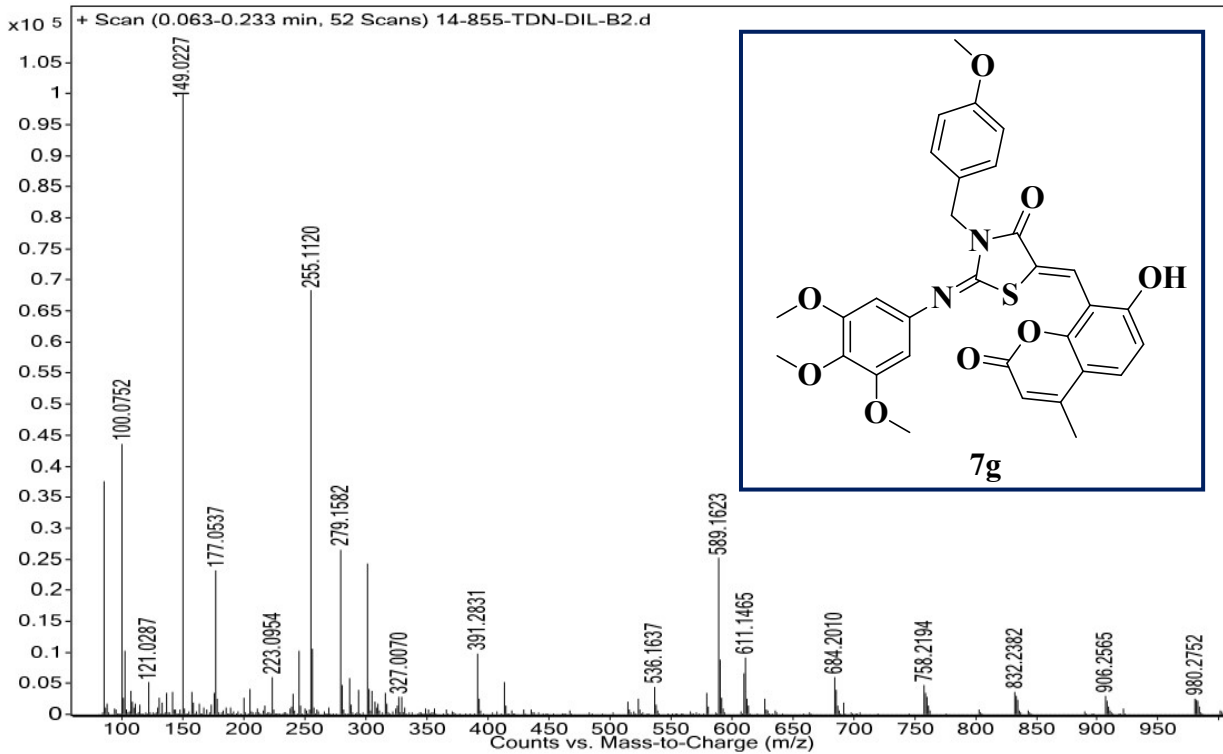

Compound (7g)

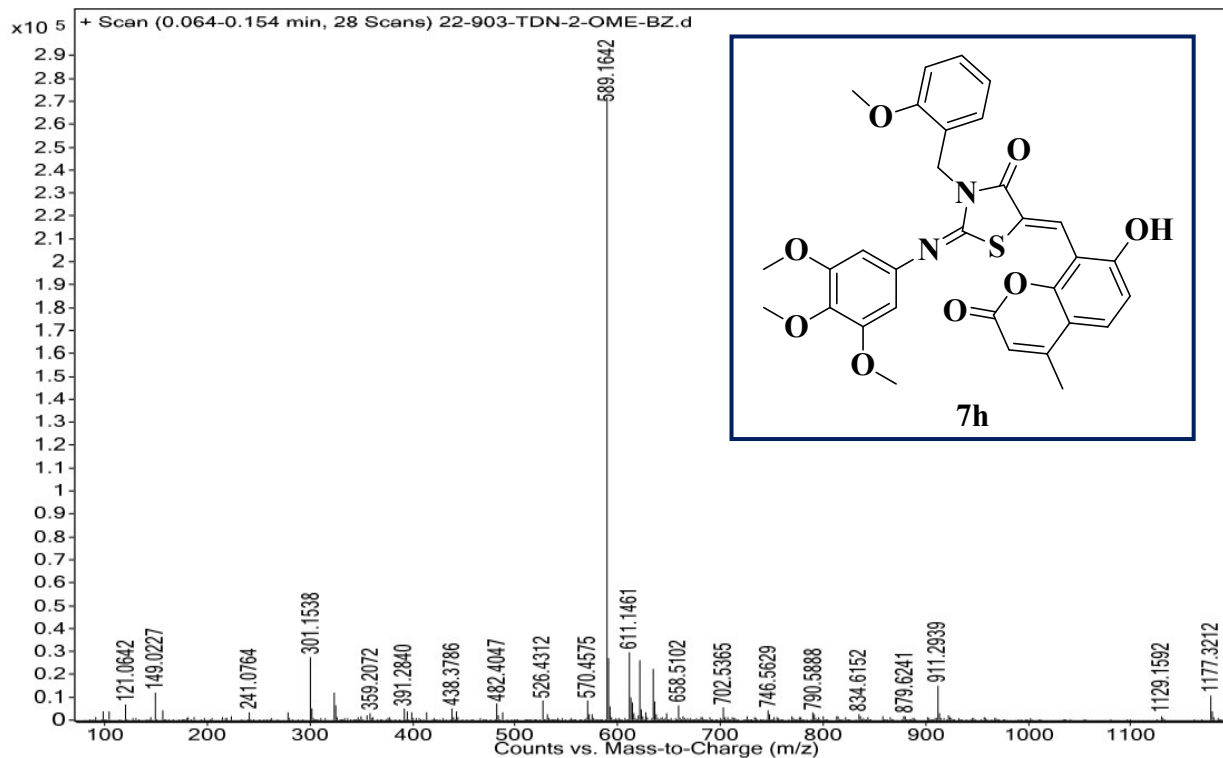

Compound (7h)



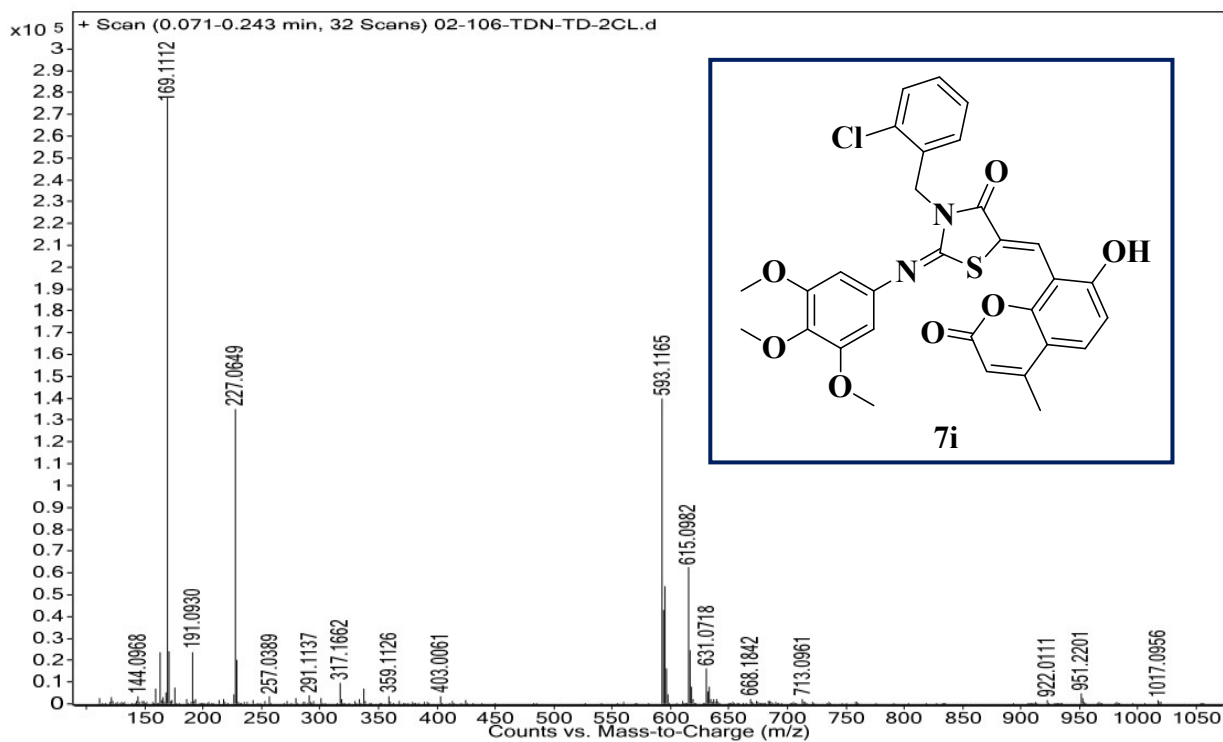

Compound (7i)

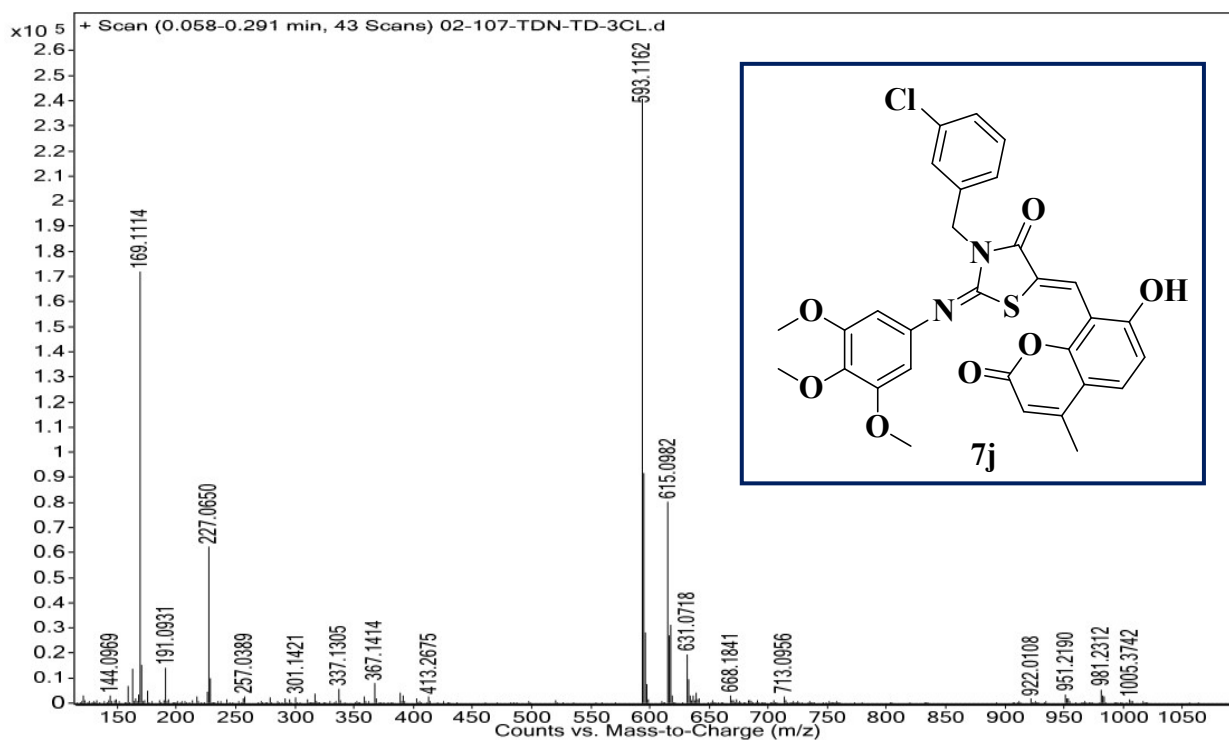

Compound (7j)

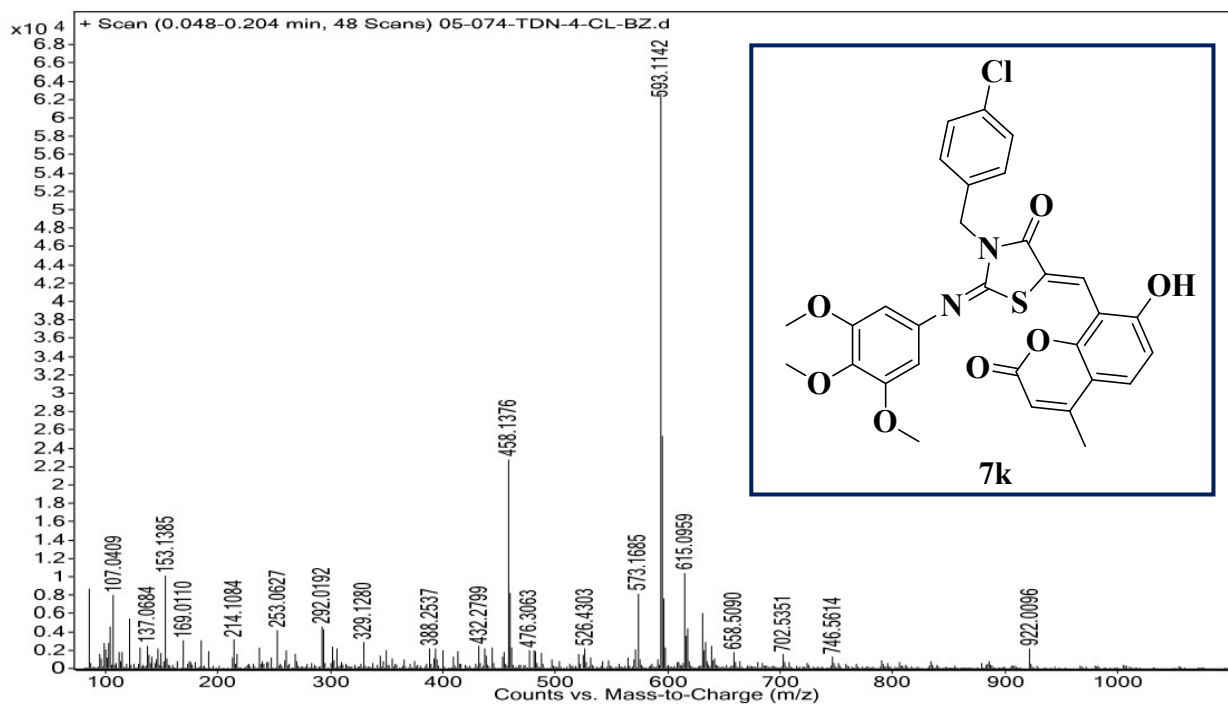

Compound (7k)

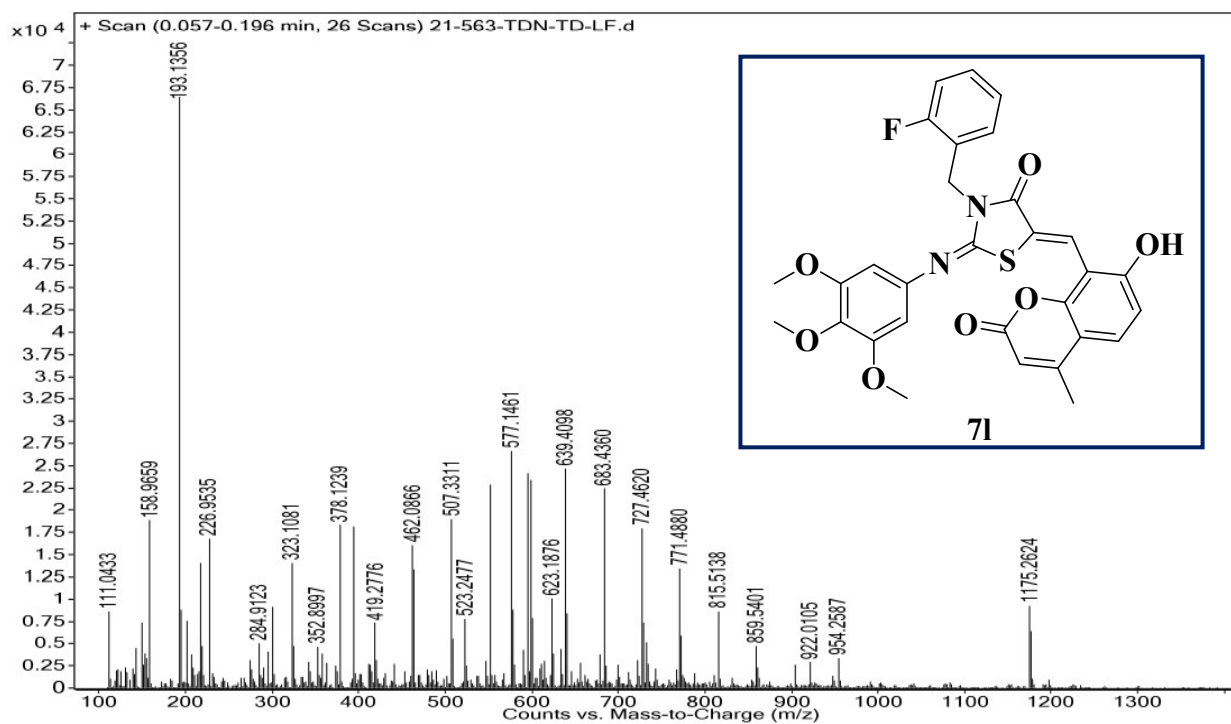

Compound (7l)

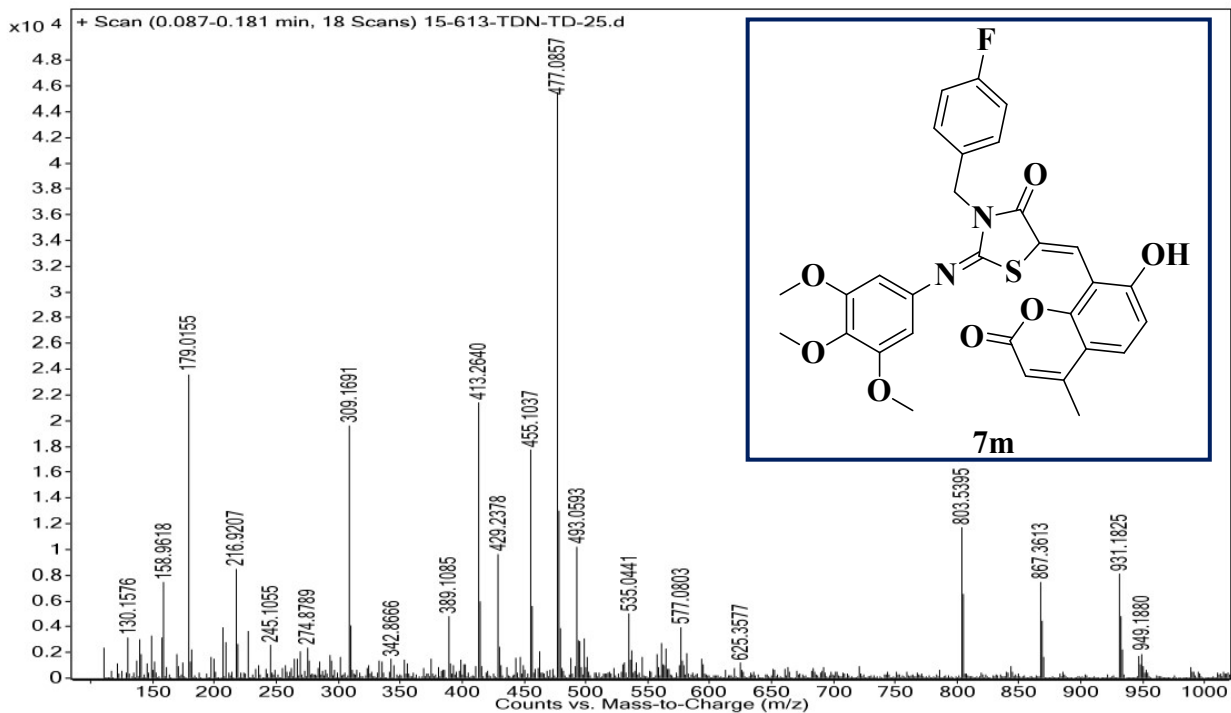

Compound (7m)

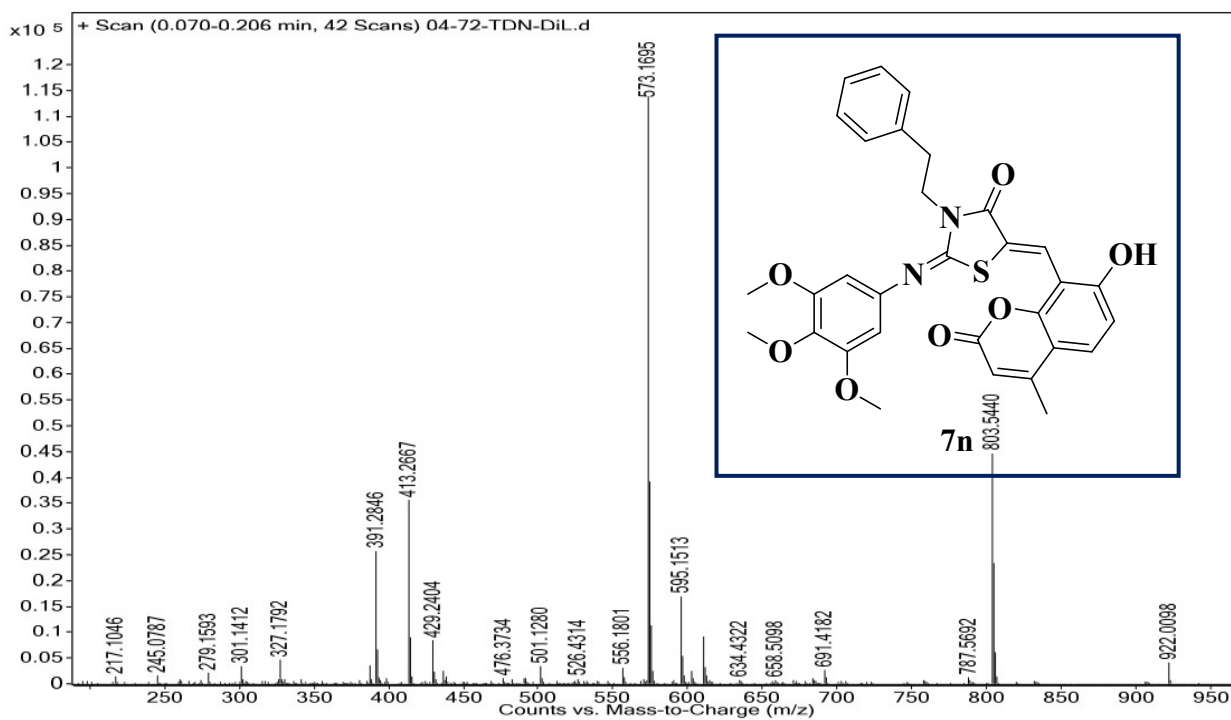

Compound (7n)

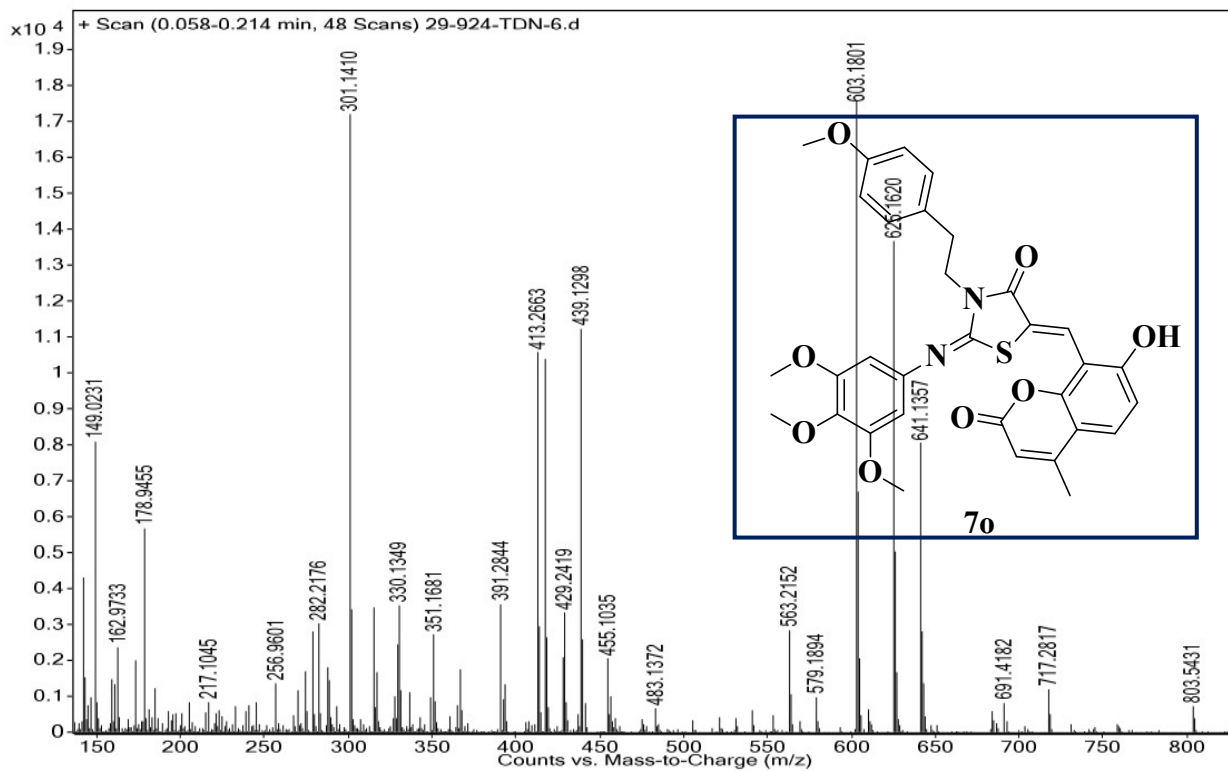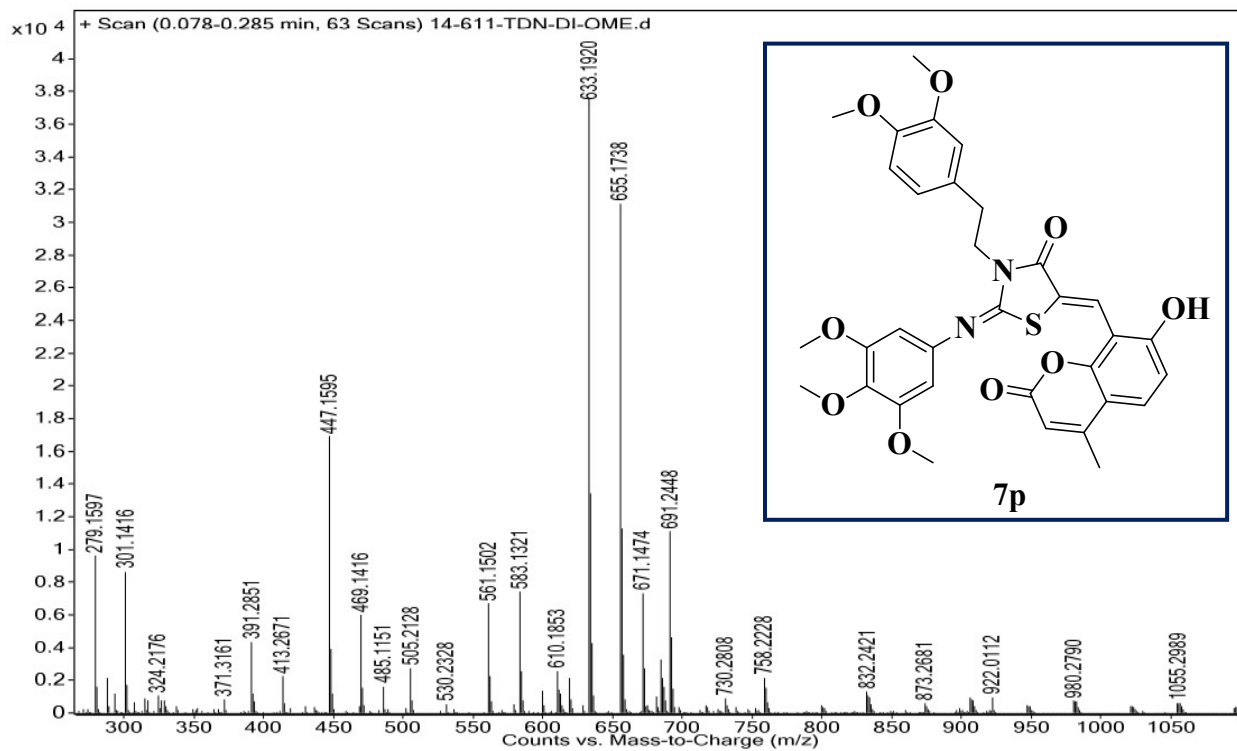

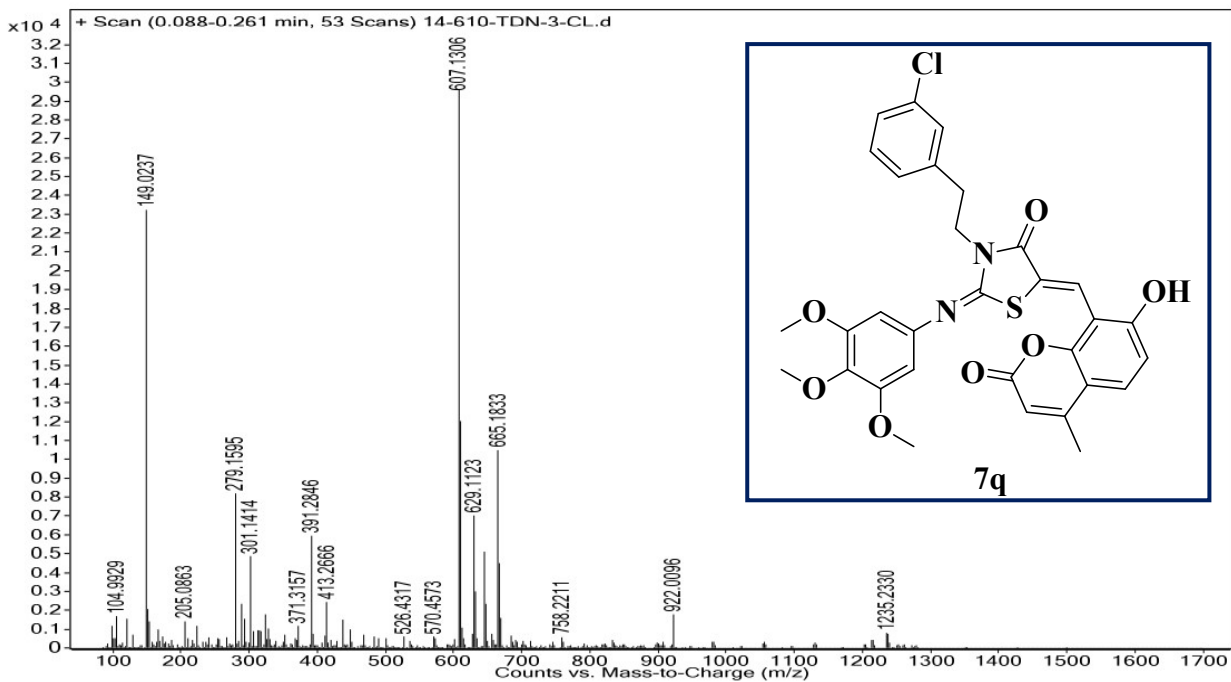

Compound (7q)

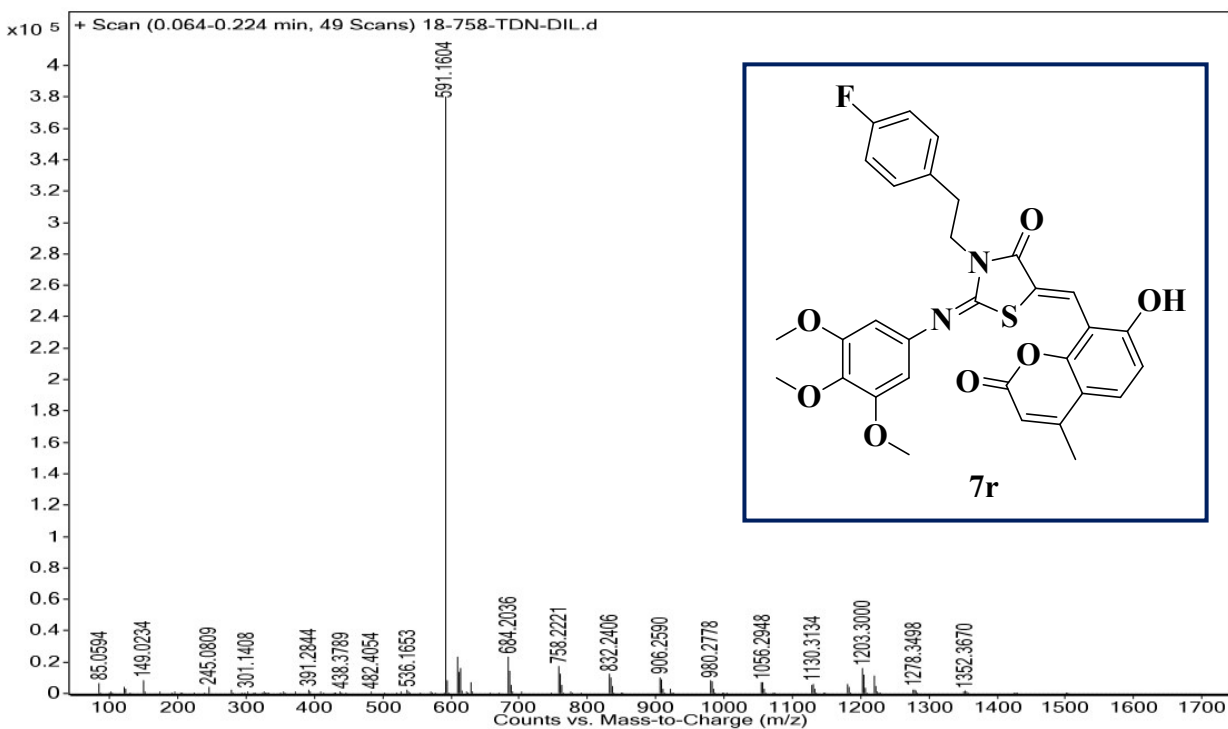

Compound (7r)

## IR spectra of compound 7q

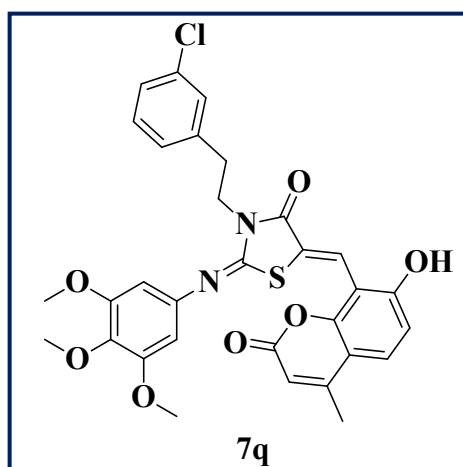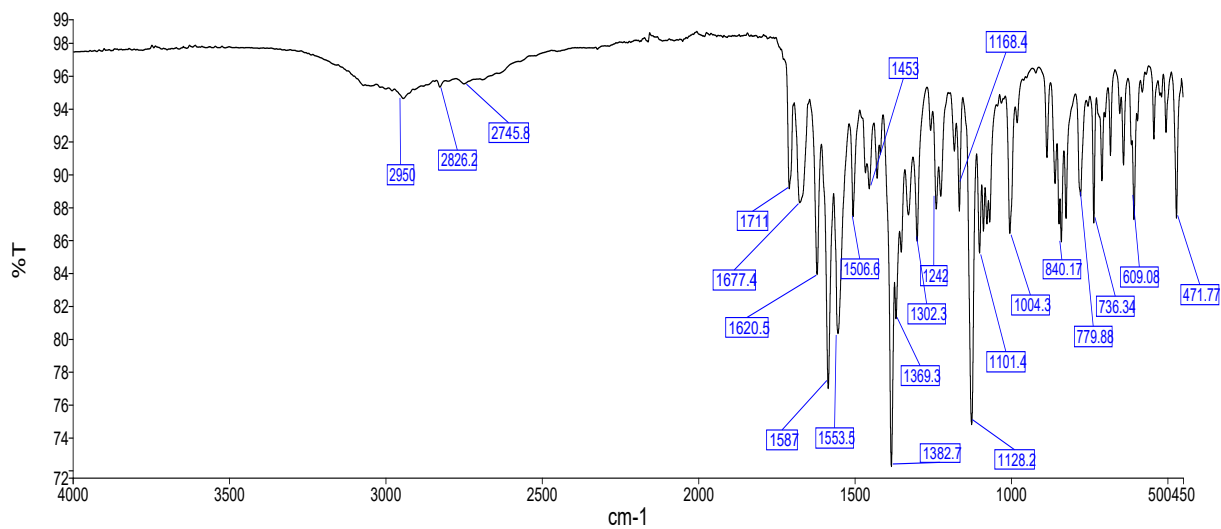

Compound (7q)

FT-IR (cm<sup>-1</sup>): 2950, 2826, 2745, 1711, 1677, 1620, 1587, 1553, 1382, 1302, 1242, 1128, 1004, 840, 779, 736, 609, 471;

## HPLC data of compound 7q

To check the purity of the most active compound (**7q**), HPLC analysis was performed and the results indicated >98% of purity for **7q**.

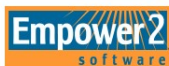

NIPER

### NIPER HYDERABAD

Sample Name: std mc  
Sample Type: Unknown  
Vial: 25  
Injection #: 1  
Injection Volume: 10.00 ul  
Run Time: 20.0 Minutes  
Date Acquired: 8/10/2021 8:33:10 PMIST  
Date Processed: 8/12/2021 6:48:03 PMIST

Acquired By: System  
Sample Set Name: nagesh mc  
Acq. Method Set: nagesh mc  
Processing Method: MC02  
Channel Name: 250.0nm  
Proc. Chnl. Descr.: PDA 250.0 nm

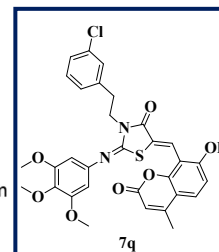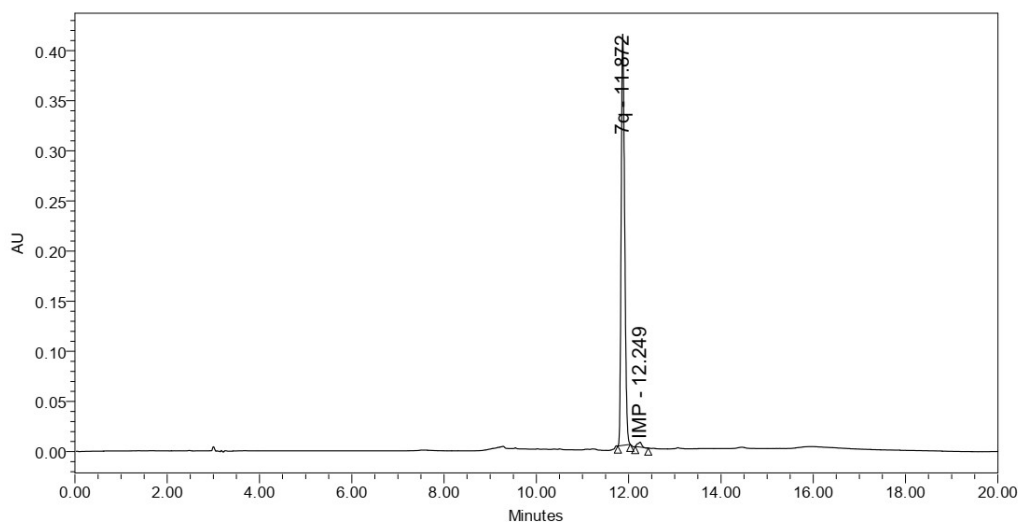

| Peak Name | RT     | Area    | % Area | Height |
|-----------|--------|---------|--------|--------|
| 1 7q      | 11.872 | 2152898 | 98.62  | 410211 |
| 2 IMP     | 12.249 | 30063   | 1.38   | 4821   |

Reported by User: System  
Report Method: NIPER  
Report Method ID: 2721  
Page: 1 of 1

Project Name: BhoopendraNAGESH  
Date Printed: 8/12/2021  
6:58:44 PM Asia/Calcutta

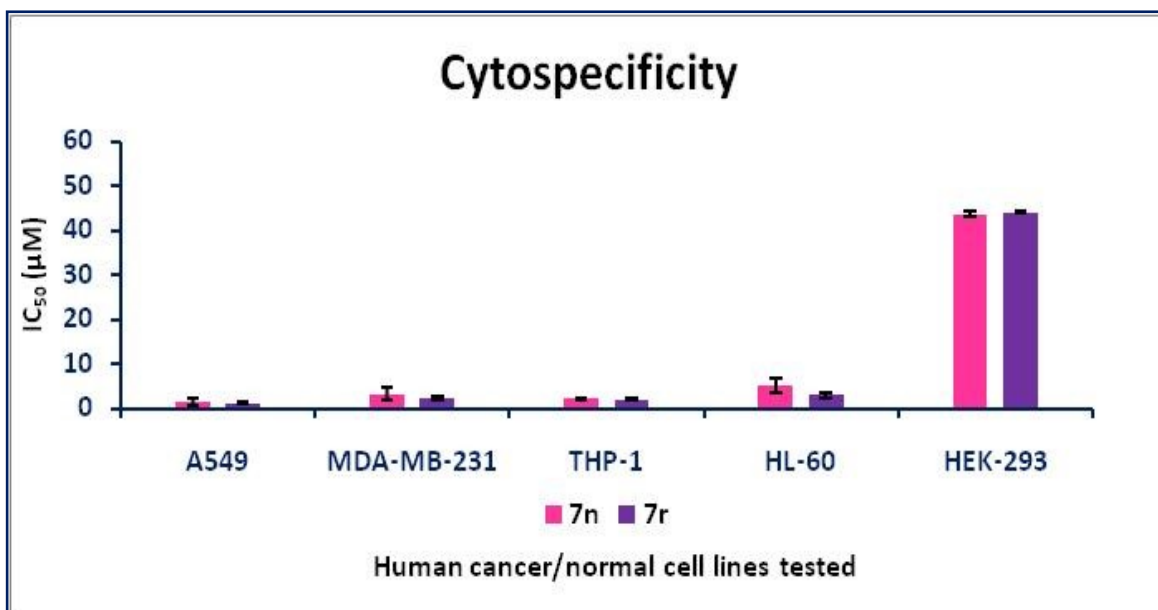

**Figure S1.** Cytospecificity comparison of compounds **7n** and **7r** towards human cancer cell lines tested in comparison to normal human embryonic kidney cells.

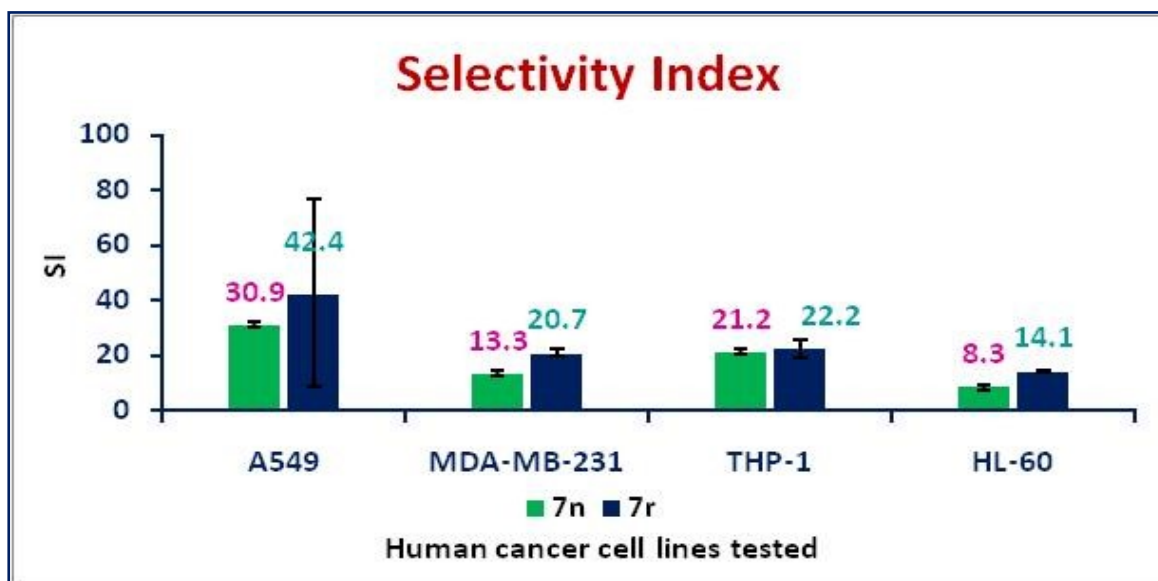

**Figure S2.** Selectivity Index (SI) comparison of compounds **7n** and **7r** and the order of selectivity is A549 > THP-1 > MDA-MB-231 > HL-60.



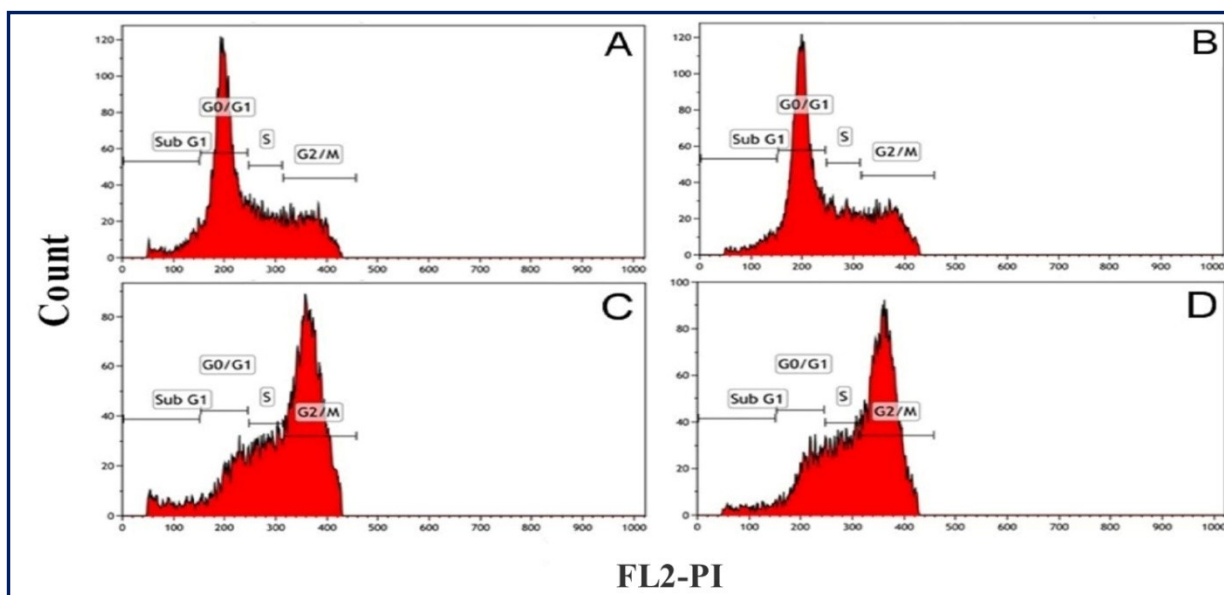

**Figure S3.** Flow cytometric analysis of cell cycle distribution. Dot plots obtained on treatment of HEK-293 and A549 cells with compound **7q**. Images **A** and **B** depicts the control HEK-293 and A549 cells respectively. Images **C** and **D** represents the **7q** treated HEK-293 and A549 cells respectively.
